1           **Using embedded alginate microparticles to tune the properties of *in situ* forming poly(*N*-**  
2           **isopropylacrylamide)-graft-chondroitin sulfate bioadhesive hydrogels for replacement and repair**  
3           **of the nucleus pulposus of the intervertebral disc**

4  
5 Thomas Christiani<sup>1</sup>, Karen Mys<sup>2</sup>, Karl Dyer<sup>3</sup>, Jennifer Kadlowec<sup>4</sup>, Cristina Iftode<sup>5</sup>, Andrea Jennifer Vernengo<sup>1,2,6</sup>

6  
7                           <sup>1</sup> Rowan University, Department of Biomedical Engineering,  
8                           201 Mullica Hill Rd, Glassboro, NJ 08028, USA;

9                                           <sup>2</sup>AO Research Institute Davos  
10                           Clavadelerstrasse 8, Davos Platz 7270 Switzerland

11                           <sup>3</sup> Rowan University, Department of Mechanical Engineering,  
12                           201 Mullica Hill Rd, Glassboro, NJ 08028, USA

13                           <sup>4</sup> Baldwin Wallace University, Department of Computer Science and Engineering  
14                           275 Eastland Rd, Berea, OH 44017, USA

15                           <sup>5</sup> Rowan University, Department of Molecular and Cellular Biosciences,  
16                           201 Mullica Hill Rd, Glassboro, NJ 08028, USA

17                           <sup>6</sup> Rowan University, Department of Chemical Engineering,  
18                           201 Mullica Hill Rd, Glassboro, NJ 08028, USA

19

20 Corresponding author: Andrea Jennifer Vernengo

21 Email address: Andrea.Vernengo@aofoundation.org

22

23

24 **Abstract**

25           Low back pain (LBP) is a major public health issue associated with degeneration of the  
26 intervertebral disc (IVD). The early stages of degeneration are characterized by the dehydration of the  
27 central, gelatinous portion of the IVD, the nucleus pulposus (NP). One possible treatment approach is to  
28 replace the NP in the early stages of IVD degeneration with a hydrogel that restores healthy biomechanics  
29 while supporting tissue regeneration. The present study evaluates a novel thermosensitive hydrogel based  
30 on poly(*N*-isopropylacrylamide-graft-chondroitin sulfate) (PNIPAAm-g-CS) for NP replacement. The  
31 hypothesis was tested that the addition of freeze-dried, calcium crosslinked alginate microparticles (MPs)  
32 to aqueous solutions of PNIPAAm-g-CS would enable tuning of the rheological properties of the  
33 injectable solution, as well as the bioadhesive and mechanical properties of the thermally precipitated  
34 composite gel. Further, we hypothesized that the composite would support encapsulated cell viability and  
35 differentiation. Structure-material property relationships were evaluated by varying MP concentration and  
36 diameter. The addition of high concentrations (50 mg/mL) of small MPs ( $20 \pm 6 \mu\text{m}$ ) resulted in the  
37 greatest improvement in injectability, compressive mechanical properties, and bioadhesive strength of  
38 PNIPAAm-g-CS. This combination of PNIPAAm-g-CS and alginate MPs supported the survival,  
39 proliferation, and differentiation of adipose derived mesenchymal stem cells (ADMSCs) towards an NP-  
40 like phenotype in the presence of soluble GDF-6. When implanted *ex vivo* into the intradiscal cavity of  
41 degenerated porcine IVDs, the formulation restored the compressive and neutral zone (NZ) stiffnesses to  
42 intact values and resisted expulsion under lateral bending. Overall, results indicate the potential of the  
43 hydrogel composite to serve as a scaffold for supporting NP regeneration. This work uniquely  
44 demonstrates that encapsulation of re-hydrating polysaccharide-based MPs may be an effective method  
45 for improving key functional properties of *in situ* forming hydrogels for orthopaedic tissue engineering  
46 applications.

47

## 48 1. Introduction

49 Low back pain (LBP) is a ubiquitous public health issue which burdens health care systems  
50 world-wide, affecting up to 80% of adults [1, 2]. LBP in patients is often associated with degeneration of  
51 the intervertebral disc (IVD) [3-6]. The intervertebral disc (IVD) is the load bearing joint between  
52 vertebrae consisting of a central nucleus pulposus (NP) and peripheral annulus fibrosus (AF). The NP is  
53 an amorphous gel comprised of collagen II and elastin fibers dispersed in a water-rich aggrecan phase [7].  
54 In contrast, the AF has an organized, anisotropic structure made up of lamellae, or multilayered, oriented  
55 collagen fibers in an angle-ply structure [8]. The highly swellable NP expands radially under compressive  
56 loads and transfers the loads to the outer AF in circumferential tension [9]. With aging, increased  
57 catabolism reduces the collagen II and aggrecan content of the NP [10], resulting in loss of its swelling  
58 capacity, a change in the load distribution, and the formation of tears and fissures in the AF. These  
59 structural changes may be accompanied by vascularization and neoinnervation [11], associated with pain  
60 [12, 13]. Current clinical treatments for low back pain include a combination of analgesics with physical  
61 therapy or discectomy to remove nerve impinging disc tissue [14]. While these interventions provide  
62 immediate pain relief, they do not restore the healthy biomechanics to the tissue, so degeneration can  
63 continue or even accelerate. [15-17]

64 Because early stage IVD degeneration is characterized primarily by changes in the NP region, the  
65 tissue is a target for newly developed therapeutic interventions. For instance, if the annulus and endplates  
66 are still competent, a swellable biomaterial can be implanted to replace the dehydrating NP. Injectability  
67 is considered paramount so the hydrogel can be implanted intradiscally with minimal damage to the AF  
68 and fill irregularly shaped tissue defects in the NP. Due to high *in vivo* intradiscal pressures [18], the  
69 injectable hydrogel solution must have sufficient viscosity to be injected into an NP region without  
70 extravasation [19]. Once cured, the hydrogel should deform mechanically like the native healthy NP [20,  
71 21]. For tissue engineering approaches to repairing the IVD, the injectable hydrogel must meet these  
72 requirements and also support viability of encapsulated cells and prevent their leakage during motion and  
73 loading [22, 23]. Towards these design goals, multiple *in situ* forming hydrogel materials have been

74 studied for NP replacement and regeneration, like decellularized matrix-based systems [24, 25], alginate  
75 [26], collagen [27, 28], hyaluronic acid [29, 30], and chitosan [31].

76 Notably, in an *ex vivo* test with ovine IVDs [20], neither the implantation of hydrogel NP  
77 replacements or the re-implantation of the natural nucleus tissue restored functionality of an intact disc. It  
78 was concluded that integration with the surrounding AF tissue is a critical component of an NP  
79 replacement strategy. Thus, in parallel with the development of injectable cell-friendly systems with  
80 tunable mechanical properties, recent research has focused on engineering hydrogel bioadhesives that  
81 adhere to surrounding tissue in the IVD to minimize the risk of herniation and improve biomechanical  
82 performance. Fibrin is a biocompatible, *in situ*-forming carrier that forms an adhesive bond with tissue  
83 [32]. However, fibrin degrades quickly, thus making it non-ideal for the long repair process of the IVD  
84 [33]. The low mechanical properties [34, 35] and bioadhesive strength [36-38] make it inappropriate for  
85 load bearing applications. Genipin-crosslinked fibrin has been investigated as a bioadhesive cell carrier  
86 for AF repair. The covalent crosslinking of fibrin with genipin improves mechanical stiffness and  
87 adhesive strength of fibrin [39], but genipin can have potentially cytotoxic effects [40-42]. An inherent  
88 challenge with fibrin-genipin is to balance the composition to improve the material properties of fibrin  
89 while promoting cell survival and extracellular matrix (ECM) deposition [43]. Injectable hydrogels based  
90 on tyramine-modified hyaluronic acid hydrogels crosslinked with horseradish peroxidase (HRP) and  
91 hydrogen peroxide (H<sub>2</sub>O<sub>2</sub>) were investigated as a bioadhesive cell carrier. However, the bonding strength  
92 to cartilage was not statistically significantly different than fibrin glue [44].

93 In response to these needs in NP repair, we sought to design a novel *in situ* forming cell carrier  
94 for NP replacement with bioadhesive properties. Previously, we reported on a novel thermosensitive graft  
95 copolymer, poly(*N*-isopropylacrylamide)-graft-chondroitin sulfate (PNIPAAm-g-CS) [45, 46]. Aqueous  
96 solutions of PNIPAAm-g-CS behave as a hydrophilic, flowable liquid below the lower critical solution  
97 temperature (LCST) of approximately 30°C, and a precipitated, soft hydrogel above the LCST. Due to  
98 this phase transition, the copolymer can be injected into the intradiscal cavity through a small gauge  
99 needle and form a space-filling gel *in situ* which is compatible with encapsulated cells [45]. The



100 limitations of using PNIPAAm-g-CS for NP replacement are its low solution viscosity below the LCST  
101 and limited bioadhesive properties, which allow immediate extravasation upon injection into an  
102 intradiscal cavity. Therefore, we sought to improve these properties of PNIPAAm-g-CS for NP  
103 replacement by generating a composite with calcium crosslinked alginate microparticles (MPs).

104 Multiple levels of rationale were used for tuning PNIPAAm-g-CS properties with MPs. There is  
105 an established link between particle-scale motion and rheological and mechanical properties of a  
106 suspension [47-49]. The viscosity of a solution increases with the addition of fine particles due to  
107 increased packing density and molecular interactions during deformation [50]. Viscosity is an important  
108 parameter for mediating adherence to tissue, since polymeric solutions that are too liquid-like lack the  
109 cohesion necessary to form substantial interactions with the tissue [51]. Embedding MPs in a hydrogel  
110 increases surface roughness [52], which can promote mechanical fixation with a tissue substrate. Further,  
111 MPs incorporated into bulk hydrogel structures enhance network toughness [53, 54]. DeVolder et. al.  
112 showed that poly(lactic-co-glycolic acid) MP incorporation into 3D crosslinked collagen networks  
113 increased stiffness and elasticity [55]. Notably, the encapsulation of MPs within hydrogel networks has  
114 been reported to improve mechanical performance while preserving encapsulated cell viability [56, 57].  
115 In the present study, calcium crosslinked alginate was selected to comprise the MPs because the material  
116 is inexpensive, biocompatible, hydrophilic, and can be fabricated without the use of toxic reagents.  
117 Alginate has an abundance of hydrophilic hydroxyl and carboxylic acid groups, as well as a net anionic  
118 charge [58], facilitating swellability and physical interaction with proteins in the extracellular matrix  
119 (ECM) [59, 60].

120 Herein, we test the hypothesis that the addition of calcium crosslinked alginate MPs to aqueous  
121 solutions of PNIPAAm-g-CS would enable tuning of the rheological properties of the injectable solution,  
122 as well as the bioadhesive and mechanical properties of the precipitated gel composite, improving the  
123 suitability of the material for NP replacement. Further, we hypothesized that the composite would support  
124 encapsulated cell viability, NP differentiation, and ECM synthesis.

125 This study was comprised of four aims: 1) To study structure-property relationships in injectable  
126 PNPAAm-g-CS + MP composites by varying MP concentration and diameter. Subsequently, we aimed to  
127 evaluate the formulation most closely mimicking the native NP for its ability to 2) support NP  
128 regeneration *in vitro* by encapsulated adipose derived mesenchymal stem cells (ADMSCs), 3) restore the  
129 degenerated porcine IVD compressive biomechanical properties *ex vivo*, and 4) resist expulsion from the  
130 porcine IVD cavity under lateral bending.

131

## 132 **2. Materials and Methods**

133

### 134 **2.1 Graft Copolymer Synthesis**

135 Poly(*N*-isopropylacrylamide)-graft-chondroitin sulfate (PNIPAAm-g-CS) was synthesized using  
136 free radical polymerization of *N*-isopropylacrylamide (NIPAAm) and methacrylated chondroitin sulfate  
137 (mCS) as described in previous publications [45, 46]. Based on previous results, a copolymer with a  
138 molar ratio of 1000:1 (NIPAAm:mCS) and mCS with a methacrylate degree of substitution of 0.1 was  
139 used [45, 46].

140

### 141 **2.2 Microparticle Synthesis**

142 A water-in-oil emulsion technique was used to synthesize alginate MPs of varying diameters as  
143 described in previous publications [45, 46]. Briefly, 2 % (w/v) alginate solution (Sigma-Aldrich) and 1 %  
144 (v/v) Tween 20 surfactant (Sigma-Aldrich) were emulsified in a vegetable oil phase. Low and high stir  
145 speeds were used to alter alginate and oil droplet size, resulting in large and small MP diameters,  
146 respectively. A 2 % (w/v) CaCl<sub>2</sub> solution was added dropwise to the emulsion to crosslink the alginate.  
147 Residual oil was removed from crosslinked MPs through a series of alternating centrifugation (500 x g for  
148 5 minutes) and washing steps using 70 % (v/v) isopropanol and deionized water. An average size was  
149 calculated for each batch by measuring the diameters of 50 randomly selected MPs. Alginate MPs were  
150 freeze dried and stored at 4 °C until further use.

151

## 152 **2.3 Composite Preparation and Factorial Design**

153 Freeze dried PNIPAAm-g-CS was dissolved in 0.01 M PBS at a concentration of 5 % (w/v) and  
154 blended with freeze-dried alginate MPs to create the composite hydrogels. The same batches of hydrogel  
155 and alginate MPs were used for each individual study. Batch consistency between studies was maintained  
156 by monitoring hydrogel viscosity and MP diameter. A 2x2 factorial design was used to study the effects  
157 of small (S,  $20.0 \pm 6.0 \mu\text{m}$ ) and large (L,  $120.0 \pm 39 \mu\text{m}$ ) MPs and low (25 mg/mL) and high (50 mg/mL)  
158 MP concentrations on scaffold properties. Results for four different PNIPAAm-g-CS + MP formulations,  
159 S-25, L-25, S-50, L-50 were compared to PNIPAAm-g-CS alone (P-0). Sample compositions are  
160 summarized in **Table 1**. The compositions were selected based on preliminary studies [61] demonstrating  
161 that lower MP concentrations (below 25 mg/mL) and higher MP diameters (above 150  $\mu\text{m}$ ) produced less  
162 favourable impacts on PNIPAAm-g-CS bioadhesive strength.

163

## 164 **2.4 Characterization of material properties**

165

### 166 **2.4.1 Swelling Properties**

167 Approximately 500  $\mu\text{L}$  of each solution formulation ( $n = 5$  per group) was gelled at 37 °C and  
168 swelled *in vitro* in 0.01 M PBS for 14 days. The PBS solutions were refreshed every other day. The  
169 swelling ratio for each sample at the beginning and end of the study was calculated as the wet weight  
170 divided by the dry weight.

171

### 172 **2.4.2 Scanning Electron Microscopy**

173 Scaffold architecture was evaluated over the 14-day swelling period using a Phenom Pure  
174 scanning electron microscope (SEM) (Nanoscience Instruments) equipped with a cryostage. Immediately  
175 prior to analysis, the gel samples were removed from PBS, directly placed on pre-warmed foil wraps,  
176 flash frozen in liquid nitrogen, and imaged at  $-20 \text{ }^\circ\text{C}$ .

177

### 178 **2.4.3 Enzymatic Degradation**

179           Approximately 0.3 mL of samples P-0 or S-50 ( $n = 5$  per group) was immersed in 2 mL of 0.01  
180 M PBS containing either 0.1 mg/mL collagenase P, 0.01 mg/mL hyaluronidase, 50 ng/mL aggrecanase, or  
181 0.1 U/mL chondroitinase ABC (Sigma Aldrich). Enzyme solution was maintained at 37 °C and refreshed  
182 each day for 7 days. As a control, formulations were exposed to 0.01 M PBS without enzyme. The  
183 percent mass loss was calculated using Equation 1:

$$184 \text{ Mass Loss (\%)} = 100 * \frac{M_0 - M_F}{M_0} \quad (1)$$

184 where,  $M_0$  and  $M_F$  are the initial and final dry masses of the sample, respectively.

185

### 186 **2.4.4 Rheological Characterization**

187           The rheological properties of each formulation were characterized using a Texas Instrument  
188 DHR-3 rheometer. A 20 mm parallel plate configuration with a 500  $\mu\text{m}$  gap (160  $\mu\text{L}$  sample volume) was  
189 used for each test ( $n = 5$ ). Temperature ramps were performed within the range of 25 to 37 °C at 1 °C/min  
190 and a constant 1 % strain and 1 Hz frequency. Gel points were identified as the crossover of the storage  
191 modulus ( $G'$ ) and loss modulus ( $G''$ ). Frequency sweeps were performed within the range of 0.01 to 15  
192 Hz with a constant 1 % strain and temperature of 37 °C. The parameters  $G'$ ,  $G''$ , complex modulus ( $G^*$ ),  
193 and phase shift angle ( $\delta$ ) were quantified for each formulation.

194

### 195 **2.4.5 Bioadhesive Properties**

196           All *in vitro* adhesive and mechanical characterization studies were performed on a Shimpo E-  
197 Force Test Stand with a 2 N load cell (FGV-0.5XY). Tensile and lap shear tests were executed based on  
198 ASTM standards F2258-05 and F2255-05, respectively. For the tensile tests, 25  $\mu\text{L}$  of cold hydrogel  
199 solution was pipetted between porcine inner AF tissue substrates, which were cut to 0.5  $\text{cm}^2$  and spaced

200 1mm apart. Hydrogel-substrate combinations were immersed in a 37 °C water bath for 5 minutes under a  
201 preload of 0.01 N before application of the tensile strain at a rate of 5 mm/min.

202 For the lap shear tests, 50  $\mu$ L of hydrogel solution was applied between rectangular substrates  
203 (0.5 cm x 1 cm), equilibrated for 5 minutes of gelation at 37 °C in the water bath, then sheared at a rate of  
204 5 mm/min. The ultimate adhesive tensile and shear strengths were determined from the load-displacement  
205 data normalized to the cross-sectional area of the AF tissue. To visualize biomaterial interaction with the  
206 substrates, a set of samples were collected for histological assessment immediately after application to the  
207 tissue. The tissue-biomaterial constructs were fixed with 4% formaldehyde in PBS for 24 h at 37 °C,  
208 embedded in frozen section compound, sectioned to 30  $\mu$ m, and stained with alcian blue to enable  
209 visualization of the tissue, rich in glycosaminoglycan (GAG), and the biomaterials, which non-  
210 specifically absorb the dye. The cells in the tissue were counterstained with Weigert's hematoxylin.

211

#### 212 **2.4.6 Unconfined Compressive Properties**

213 For the unconfined compression tests ( $n = 5$ ), cylindrical hydrogels (formulations P-0, S-25, S-50,  
214 L-25, and L-50) were pre-formed in 48-well plates at 37 °C for 5 minutes. Then, the hydrogels were  
215 transferred to a 37 °C saline bath where they were deformed at a rate of 1 mm/min. Data were normalized  
216 to stress and strain using the initial cross-sectional area and height of each hydrogel and the unconfined  
217 compressive moduli reported at 25% strain.

218

#### 219 **2.4.7 Confined Compressive Properties**

220 Confined compression tests ( $n = 7$ ) were performed based on ASTM F2789-10 using a custom-  
221 built apparatus with a surrogate AF mold composed of RTV-630 silicone elastomer (Momentive  
222 Performance Materials Inc.). The apparatus was encased in plexiglass filled with saline maintained at 37  
223 °C. Approximately 350  $\mu$ L of hydrogel solution was injected into the mold and allowed to equilibrate to  
224 temperature before deforming at a rate of 1 mm/min. Data were normalized to stress and strain using the

225 initial cross-sectional area and height of each hydrogel and the confined compressive moduli reported at  
226 25% strain.

227 Due to its bioadhesive properties, ease of injectability, and mechanical performance approaching  
228 the native NP, formulation S-50 was the focus of subsequent *in vitro* cell culture studies and *ex vivo*  
229 biomechanical tests. As a control for the cell viability analysis, metabolic activity assay, and histological  
230 characterization, cell encapsulation within P-0 was evaluated in parallel.

231

## 232 **2.5 *In vitro* cell culture studies**

### 233 **2.5.1 Expansion of ADMSCs**

234 Commercial normal human ADMSCs (ScienCell, female donor, 30 years old) were expanded in  
235 monolayers using MSC basal medium (ScienCell) containing 5 % fetal bovine serum (FBS), 5 % MSC  
236 growth supplement, and 5 % penicillin/streptomycin solution and cultured in an incubator at 37 °C with 5  
237 % CO<sub>2</sub>. ADMSCs were passaged to 80% confluency and used for all studies at passage 4.

238

### 239 **2.5.2 Hydrogel encapsulation of ADMSCs**

240 Lyophilized PNIPAAm-g-CS and alginate MPs were sterilized by soaking in 70% isopropanol  
241 and exposure to UV light. Then, 5 % w/v PNIPAAm-g-CS was prepared in NP differentiation medium  
242 containing high glucose DMEM (Gibco), 1 % FBS (Gibco), insulin-transferrin-selenium-ethanolamine  
243 (ITS-X) (Gibco), 100 μM L-ascorbic acid-2-phosphate (Sigma-Aldrich), 1.25 mg/mL bovine serum  
244 albumin (BSA) (Sigma-Aldrich) , 0.1 μM dexamethasone (Sigma-Aldrich), 40 μg/mL L-proline (Sigma-  
245 Aldrich), 5.4 μg/mL linoleic acid (Sigma-Aldrich), antibiotic-antimycotic (Gibco) and 100 ng/mL of  
246 GDF6 (PeproTech) [62]. Pelleted ADMSCs were combined with the solutions prepared in media of 5%  
247 PNIPAAm-g-CS + alginate MPs (S-50) or 5% PNIPAAm-g-CS (P-0). The final cell density in each of  
248 the formulations was 5 x 10<sup>6</sup> cell/mL. Lastly, approximately 100 μL of each cell-seeded formulation was  
249 dispensed into a 48 well plate and gelled before adding 500 μL of NP differentiation media on top. Media  
250 was refreshed every other day and the formulations were cultured for 14 days.

251

### 252 **2.5.3 Evaluation of Cellular Viability and Metabolic Activity**

253 Live/Dead™ Viability/Cytotoxicity Kit (Invitrogen) was used to assess ADMSC viability. At day  
254 14 of culture, formulation S-50 or P-0 was dissolved in 0.01 M PBS containing 50 mM citrate (Sigma-  
255 Aldrich) and 20 mM EDTA (Sigma-Aldrich). Sodium citrate-EDTA buffer dilutes the hydrogel and  
256 reverses ionic alginate-Ca<sup>2+</sup> crosslinks for complete removal of polymeric material, which obstructs  
257 visualization of the cells. Suspended cells were pelleted at 300 x g for 5 minutes at 4 °C and resuspended  
258 in Live/Dead™ reagent containing 2 μM calcein AM and 4 μM ethidium homodimer-1 in high glucose  
259 DMEM for 1 hour at 37 °C and 5 % CO<sub>2</sub>. Cells were isolated from the Live/Dead™ reagent, rinsed with  
260 0.01 M PBS, dispensed in a 48 well plate, and imaged using an inverted fluorescent light microscope.  
261 Cellular viability was quantified using ImageJ software.

262 ADMSC metabolic activity was tracked over 14 days using the alamarBlue® Cell Viability  
263 Assay (Bio-Rad). Media was removed from samples of S-50 or P-0 (*n* = 5 each), replaced with 300 μL of  
264 10 % alamarBlue reagent in NP differentiation medium, and incubated for 5 hours at 37 °C and 5 % CO<sub>2</sub>.  
265 Wells without cells were used to correct for background interference. Reduced reagents were removed  
266 from the samples and absorbance readings were measured using a spectrophotometer at 570 and 600 nm.  
267 Percent reagent reduction was calculated as described by the manufacturer's instructions.

268

### 269 **2.5.4 Histology**

270 Glycosaminoglycan (GAG) and collagen production were visualized histologically after 14 days  
271 of culture. Formulation P-0 or S-50 was fixed for 10 minutes with 4 % formaldehyde (Fisher Scientific),  
272 embedded in frozen section compound (VWR), snap-frozen in methylbutane chilled with liquid nitrogen,  
273 and sectioned to 20 μm sections. Since the polymers tend to absorb the histological dyes non-specifically,  
274 slides were rinsed with sodium citrate-EDTA buffer at room temperature to remove the PNIPAAm-g-CS  
275 and alginate MPs by dissolution. Then, GAG and collagen were stained using 1 % w/v alcian blue or 0.1

276 % w/v picosirius red, respectively. Cell nuclei were counterstained with Weigert's hematoxylin. ECM  
277 deposition was compared on days 0 and 14.

278

### 279 **2.5.5 Quantitative Polymerase Chain Reaction**

280 Gene expression profiles of ADMSCs after 14 days of culture in formulation S-50 were examined  
281 using quantitative real-time polymerase chain reaction (qRT-PCR). Seeded cells were pelleted from  
282 PNIPAAm-g-CS + MPs gels by dissolution in sodium citrate-EDTA buffer and subsequent  
283 centrifugation. Total RNA was extracted using the Pure Link™ RNA Extraction Mini Kit (Ambion®,  
284 Life Technologies™), quantified in terms of concentration and purity with a nanodrop (Applied  
285 Biosystems), and reverse transcribed to cDNA using the High Capacity cDNA Reverse Transcription Kit  
286 (Applied Biosystems). Target genes (**Supplementary Table 1**) were amplified in 20 µL reactions using  
287 20 ng of cDNA, Fast SYBR® Green Master Mix (Fisher Scientific), 500 nM primer concentrations, and  
288 an Applied Biosystems 9800 Fast Thermal Cycler. Relative gene expression was calculated using the  
289 delta-delta Ct method ( $2^{-\Delta\Delta C_t}$ ) and normalized to ADMSCs on day 0 after encapsulation and the  
290 housekeeping gene GAPDH.

291

### 292 **2.5.6 Immunofluorescence**

293 For cells encapsulated in formulation S-50, an indirect immunofluorescent labeling technique was  
294 used to detect the presence of the major IVD ECM markers, aggrecan (ACAN), type I collagen (COL1),  
295 and type II collagen (COL2), as well as the NP-specific markers transcription factor hypoxia inducible  
296 factor 1-alpha (HIF1- $\alpha$ ), forkhead box F1 (FOXF1), cytokeratin 19 (KRT19), and carbonic anhydrase 12  
297 (CA12). Antibody information is summarized in **Supplementary Table 2**. Frozen sections were cut to 20  
298 µm, washed with sodium citrate-EDTA buffer, permeabilized for 10 minutes with tris-buffered saline  
299 (TBS) with 0.3 % Triton X-100 (Fisher Scientific), and blocked with 10 % v/v goat serum in TBS for 10  
300 minutes. Primary antibodies were applied for 1 hour at room temperature. Secondary antibodies  
301 conjugated with Alexa Fluor 647 (Molecular Probes, 1:200 dilution) were applied for 30 minutes at room.



302 Sections were counterstained with 4',6-diamidino-2-phenylindole dihydrochloride (DAPI) and imaged on  
303 a confocal microscope (Model A1+, Nikon Instruments Inc.). Immunofluorescent staining performed on  
304 sections without primary, secondary, or any antibodies from either mouse or rabbit species served as  
305 controls to check for non-specific staining or endogenous autofluorescence. Immunofluorescent protein  
306 expression was compared on days 0 and 14.

## 307 **2.6 *Ex Vivo* Biomechanical Testing**

309

### 310 **2.6.1 Dissection and Casting of Porcine IVDs**

311 Lumbar spines from healthy male and female porcine donors (5 – 6 months old, 250 – 300 lb.)  
312 were purchased from Tissue Source, LLC (LaFayette, IN) and IVDs were isolated for biomechanical  
313 testing. External tissue, posterior and transverse elements were removed and individual motion segments  
314 were isolated by cutting through the midline of each vertebral body using a bone band saw (Mar-Med  
315 Inc.). Specimens were analyzed with Image J software to determine the average cross-sectional area ( $8.2$   
316  $\pm 0.4$  cm<sup>2</sup>), potted in a polyurethane (Smooth Cast), and frozen at -20°C. IVD specimens were pre-  
317 warmed over several hours 37 °C water bath prior to testing.

318

### 319 **2.6.2 Injury, Implantation, and Biomechanical Characterization**

320 Potted porcine IVDs (n=7 per group) were loaded on an MTS 831 Elastomer Test System using  
321 cycles of compression and tension, as has been reported prior in biomechanical studies with human [63],  
322 bovine [19, 64], and caprine IVD [65]. The motion segments were compressed to -1000 N and tensed to  
323 100 N for 10 cycles at a rate of 0.1 Hz while maintained in a 37 °C saline bath during testing. The peak  
324 compressive loads were scaled for differences in cross-sectional area between human and porcine and  
325 selected to represent physiological pressures of jogging or climbing stairs two at a time [18]. The first  
326 nine cycles were performed as preconditioning to establish a repeatable hysteresis response and the  
327 biomechanical parameters were calculated using the 10<sup>th</sup> cycle.

328 Each disc was subjected to the compression-tension cycles at each of the following conditions to  
329 detect changes in biomechanical parameters. First, the mechanical properties of the intact specimens were  
330 measured to obtain a baseline reference. Second, the specimens were punctured approximately 15 – 30°  
331 from the coronal plane with an 18G needle ("Punctured" condition). Third, denucleation was performed  
332 using the needle attached to a syringe with vacuum ("Denucleated" condition). An average of 294 ± 41  
333 mg or 44 ± 8.9% of NP tissue was removed from the IVDs to create a cavity. Then, a compressive load  
334 from -1800 N to 0 N was applied for 50 cycles at a rate of 0.1 Hz to induce further degeneration to the  
335 disc by excessive mechanical fatigue ("Degenerated" condition). Last, formulation S-50, cooled to 4°C,  
336 was injected into the cavity until the syringe plunger could no longer be depressed manually ("Injected"  
337 condition). The average mass of composite hydrogel that was injected into the IVDs was 340 ± 43 mg.  
338 Implanted motion segments were incubated for 10 minutes prior to loading to allow time for complete  
339 gelation.

340 A MATLAB (Mathworks, Natick, MA, USA) code was used to calculate compressive stiffness,  
341 neutral zone (NZ) stiffness, and range of motion (ROM) as described by Hom et al. 2019 [64].  
342 Biomechanical parameters at each condition were normalized to that of the intact disc.

343

### 344 **2.6.3 Expulsion testing**

345 Lateral bending tests were performed to observe the resistance of formulation S-50 to expulsion  
346 through the needle tract ( $n = 7$ ). Custom-designed mechanical fixtures were created to bend the IVDs  
347 (**Supplementary Figure 1A**). Specimens were denucleated, injected with composite, and subjected to  
348 lateral bending by applying a vertical displacement (- 4 to + 4 mm) at a position 25.4 mm from the center  
349 of the specimen (**Supplementary Figure 1B**) to increase the bending angle continuously at a rate of  
350 0.1°/s on the side opposite of the injection. The test was stopped manually when the maximum bending  
351 angle was reached due to geometric constraints of the tissue. Angles were tracked using a video camera  
352 recording at a rate of 30 frames per second. Torque was calculated as the applied force multiplied by the  
353 perpendicular distance from the axis of rotation.

354

#### 355 **2.6.4 Histology of implanted porcine IVDs**

356 Histology was performed to qualitatively assess implant conformation in the intradiscal cavity of  
357 the porcine IVD. Specimens (n=3) were either (1) intact, (2) denucleated, or (3) denucleated and injected  
358 with formulation S-50. After treatment, the discs were fixed with 4% formaldehyde in PBS for 24 h at 37  
359 °C. Bone segments were decalcified using 5% v/v HCl in PBS for 24 h at 37 °C. Discs were embedded in  
360 frozen section compound and sectioned in the sagittal direction to 30 µm. GAGs and collagen were  
361 stained with alcian blue and picosirius red, respectively. Cross sections were imaged using a stereoscope.

362

#### 363 **2.7 Statistical Analysis**

364 Graphpad Prism 8 (San Diego, CA) was used for all statistical analyses. Welch's t-tests were used  
365 to identify statistical differences between sample groups. All values are reported as the mean ± standard  
366 deviation (SD). Significance was set at the 95 % confidence level ( $p < 0.05$ ).

367

### 368 **3. Results**

369

#### 370 **3.1. *In vitro* Material Characterization**

371 SEM imaging was used to visualize the microscopic architecture of the hydrogel formulations  
372 (**Figure 1A**). After 14 days of swelling *in vitro*, formulation P-0 exhibited a noticeable decrease in  
373 porosity and pore diameter due to the hydrophobic behavior of the PNIPAAm macromolecular chains at  
374 37 °C. At day 14, with the incorporation of MPs into the formulations, S-25, L-25, S-50, and L-50  
375 qualitatively exhibited higher porosity compared to P-0, with S-50 and L-50 exhibiting the highest  
376 porosities.

377 The swelling ratios at days 0 and day 14 were compared for the formulations (**Figure 1B**). P-0  
378 was the only formulation exhibiting a significant decrease ( $p < 0.05$ ) in swelling ratio over this time  
379 period. The incorporation of MPs into PNIPAAm-g-CS hydrogels (S-25 and L-25) produced significant

380 increases in swelling ratio compared to P-0 at day 14 ( $p < 0.01$  and  $p < 0.05$ , respectively). The increase  
381 in swelling ratio compared to P-0 was more pronounced for higher concentrations of MPs (S-50 and L-50,  
382  $p < 0.01$ ). At a given concentration of MPs, varying the diameter did not significantly change the swelling  
383 ratio ( $p > 0.05$ ).

384 The degradation behavior of formulations P-0 and S-50 in PBS and various enzymatic solutions is  
385 summarized in **Figure 1C**. No significant loss in dry mass between 0 and 7 days in PBS ( $p > 0.05$ ) was  
386 measured. Exposure to the enzyme collagenase or aggrecanase did not significantly degrade the samples  
387 compared to the PBS control ( $p > 0.05$ ). Compared to PBS, chondroitinase ABC caused a significant  
388 increase in mass loss of P-0 and S-50, at  $7.6 \pm 0.8\%$  and  $8.9 \pm 0.8\%$   $1.0\%$ , respectively ( $p < 0.01$ ). Also  
389 compared to PBS, hyaluronidase caused a significant increase in mass loss for P-0 and S-50, at  $7.2 \pm 0.9\%$   
390 and  $13.8 \pm 1.8\%$ , respectively ( $p < 0.01$ ). For hyaluronidase, significantly higher mass loss was measured  
391 for S-50 compared to P-0 ( $p < 0.01$ ). No other enzymes produced a significantly different mass loss for P-  
392 0 compared to S-50 ( $p < 0.05$ ).

393

### 394 **3.1.2 Rheological properties**

395 A rheological temperature sweep of the formulations revealed gel points for P-0, S-25 and L-25  
396 of  $33.4 \pm 0.4\text{ }^\circ\text{C}$ ,  $30.82 \pm 1.1\text{ }^\circ\text{C}$ , and  $32.02 \pm 0.9\text{ }^\circ\text{C}$  respectively (**Figure 2A**). In contrast to these  
397 formulations, gel points for S-50 and L-50 could not be identified by a crossover of  $G'$  and  $G''$ , due to  
398 predominantly elastic behavior over the entire temperature range (**Figure 2B**). Frequency sweeps  
399 performed at a constant temperature of  $37\text{ }^\circ\text{C}$  revealed viscoelastic behavior, or frequency-dependent  
400 changes for  $G'$ ,  $G''$ , and  $\eta^*$ . Formulations P-0 (**Figure 2C,E**), S-50 (**Figure 2D,F**), as well as L-25 and L-  
401 50 (data not shown) all exhibited increases in elasticity and decreases in viscosity at higher frequency,  
402 indicated by increases in  $G'$  and decreases in  $\eta^*$ , respectively. Phase shift angle,  $\delta$ , and  $G^*$  for each of the  
403 formulations are summarized in **Table 2**. With and without MPs, values for  $\delta$  were below  $45^\circ$  over the  
404 entire frequency range tested, another indicator that the formulations behave as viscoelastic solids under  
405 dynamic shear [66]. Compared to P-0, all formulations exhibited statistically significant increases in  $G^*$

406 (p < 0.05), signifying a higher resistance to deformation. Regardless of diameter, increasing MP  
407 concentration from 25 to 50 mg/mL produced significant increases in G\*, with S-50 exhibiting the  
408 highest G\*value (p < 0.05) of all the formulations.

409

### 410 **3.1.3 Adhesive Properties**

411 Histological images of the hydrogels applied to the porcine inner AF tissue substrates before  
412 adhesion testing is shown in **Figure 3**. Qualitative observation reveals that P-0 and fibrin hydrogel spread  
413 into a thin layer along the tissue surface, whereas S-50 retained its 3D shape comprised of a network  
414 alginate MPs.

415 Adhesive strength to inner AF tissue was quantitated for each formulation in tension and shear.  
416 The tensile strength of fibrin was not significantly different than P-0 (**Figure 4A**,  $1.83 \pm 0.52$  kPa for  
417 Fibrin versus  $1.30 \pm 0.12$  kPa for P-0, p > 0.05). All of the formulations with MPs (S-25, S-50, L-25, L-  
418 50) exhibited significant increases in tensile strength compared to P-0 (p > 0.05), but only S-50  
419 outperformed the fibrin (p < 0.01). Increasing the concentration of small MPs from 25 to 50 mg/mL  
420 produced significant increases in tensile adhesive strength (p < 0.01). However, for the large MPs,  
421 increasing concentration produced no significant changes (p > 0.05). Formulations S-50 and L-50  
422 exhibited the highest tensile strengths of the formulations ( $2.79 \pm 0.23$  and  $2.62 \pm 0.53$  kPa, respectively)  
423 and were not significantly different from each other (p > 0.05).

424 The shear strength of P-0 was significantly lower than Fibrin (**Figure 4B**,  $0.96 \pm 0.17$  kPa versus  
425  $2.66 \pm 0.81$  kPa, respectively, p < 0.01). However, the shear strengths of all the formulations containing  
426 MPs (S-25, S-50, L-25, and L-50) were significantly higher than both Fibrin and P-0 (p < 0.05). Varying  
427 MP diameter did not produce any significant changes in adhesive or tensile strength (p > 0.05). However,  
428 for both MP diameters, increasing the MP concentration produced significant increases in shear strength  
429 (p < 0.02). Formulation S-50 exhibited a significantly higher shear strength compared to the other  
430 formulations ( $7.43 \pm 1.23$  kPa, p < 0.01). Overall, the formulations with MPs exhibited higher adhesive  
431 strength in shear compared to tension.

432

### 433 **3.1.4 Compressive Mechanical Properties**

434           The compressive modulus was calculated for each formulation in unconfined and confined testing  
435 conditions (**Figure 5A and B**, respectively). Under unconfined compression, all the formulations with  
436 MPs (S-25, S-50, L-25 and L-50) outperformed P-0, with a modulus value of  $1.02 \pm 0.15$  kPa ( $p < 0.01$ ).  
437 Varying MP diameter did not produce any significant changes in unconfined compressive modulus ( $p >$   
438  $0.05$ ). However, for both MP diameters, increasing the MP concentration produced significant increases  
439 in unconfined compressive modulus ( $p < 0.01$ ). Formulation S-50 exhibited a significantly higher  
440 unconfined compressive modulus compared to the other formulations ( $2.62 \pm 0.14$  kPa,  $p < 0.01$ ).

441           The confined compressive moduli for all the formulations with MPs were significantly higher  
442 than that of P-0 ( $p < 0.001$ ). Varying MP diameter did not produce any significant changes in unconfined  
443 compressive modulus ( $p > 0.05$ ). However, for both MP diameters, increasing the MP concentration  
444 produced significant increases in unconfined compressive modulus ( $p < 0.01$ ). Formulations S-50 and L-  
445 50 had the highest confined compressive moduli ( $894 \pm 78$  kPa and  $810 \pm 58$  kPa), but there was no  
446 significant difference between them ( $p = 0.05$ ).

447

### 448 **3.2 In Vitro Cell Culture Study**

449           After 14 days of encapsulation, ADMSCs showed excellent cellular viability within P-0 and S-50.  
450 The proportion of living cells in P-0 (**Figure 6A**) and S-50 (**Figure 6B**) was calculated to be  $91.8 \pm 1.7$  %  
451 and  $93.4 \pm 1.8$  %, respectively. Both P-0 and S-50 showed significant increases in reagent reduction at  
452 day 14 relative to day 0 ( $p < 0.0001$ ), indicating cell proliferation (**Figure 6C**). Reagent reduction was  
453 significantly higher for P-0 compared to S-50 at days 7 and 14 ( $p = 0.004$ ,  $p < 0.001$ , respectively).

454           Histological staining indicated that ADMSCs seeded in P-0 and S-50 synthesized GAGs and  
455 collagen, the major ECM molecules of NP tissue (**Figure 7**). Intensity of intracellular and extracellular  
456 staining increased for both formulations after 14 days of culture. Formulation P-0 showed relatively low

457 deposition of GAG and collagen compared to P-0. Also, the ECM in S-50 appeared to form concentrated  
458 striations bridging gaps between encapsulated cells (**Figure 7 C,F**).

459 ADMSC differentiation toward an NP-like phenotype was further examined in S-50 with  
460 immunofluorescent staining. Extracellular staining of the major IVD ECM components, collagen type I,  
461 collagen type II, and aggrecan was detected after 14 days of culture (**Figure 8A-C**). Prior to culturing,  
462 undifferentiated ADMSCs showed low levels of expression for these proteins (**Figure 8D-F**). In addition,  
463 higher levels of intracellular staining for the NP-specific proteins, CA12, FOXF1, HIF1 $\alpha$ , and KRT19  
464 were observed at day 14 (**Supplementary Figure 1A-E**) compared to day 0 (**Supplementary Figure 1F-**  
465 **J**).

466 PCR analysis for cells encapsulated in S-50 (**Figure 9**) indicate the significant upregulation of all  
467 tested major IVD ECM and NP-specific markers ( $p < 0.01$  for all markers relative to day 0). Among the  
468 markers, ACAN showed the highest upregulation ( $\approx 250$ -fold change, **Figure 9A**) followed by type II  
469 collagen ( $\approx 50$ -fold change, **Figure 9B**). Both type I collagen and SOX9 exhibited a relatively smaller  
470 upregulation ( $\approx 5$ -fold change, **Figure 9B and 9C, respectively**). KRT19, FOXF1, and PAX1 (**Figure**  
471 **9D-F**) were the highest upregulated NP-specific markers compared to HIF1 $\alpha$  and CA12 (**Figure 9G-H**).

472

### 473 **3.3 Ex Vivo Biomechanical Testing**

474 Formulation S-50 was also selected further evaluation in the *ex vivo* testing. The ability of the  
475 bioadhesive hydrogel to conform to surrounding disc tissue and fill an irregularly shaped defect  
476 completely was confirmed by gross observation (**Figure 10A, B**) and histology (**Figure 10C- E**).

477 The axial biomechanical results are shown in **Figure 11**. Relative to intact, denucleation  
478 produced a significant decrease in NZ stiffness ( $p=0.01$ , **Figure 11A**) and an increase in compressive  
479 stiffness, though not significant ( $p=0.16$ , **Figure 11B**). The degeneration step, comprised of excessive  
480 mechanical fatigue, resulted in a statistically significant increase in compressive stiffness relative to intact  
481 ( $p=0.03$ , **Figure 11B**). The NZ and compressive stiffnesses of the injected specimens were not  
482 significantly different than that of the intact state ( $p=0.259$  and  $p=0.208$ , **Figure 11A and B, respectively**).

483 The ROM was not significantly altered from intact by injury (puncture, denucleation, degeneration) or  
484 hydrogel injection, but trended upwards with injury and downwards with implantation (**Figure 11C**).  
485 The hydrogel remained within the disc space and expulsion through the annular defect was not observed  
486 with compressive-tensile loading.

487 Lateral bending tests were performed to evaluate the composite ability to resist expulsion from  
488 within the disc space through the needle tract. Specimens were bent to an average maximum angle of  $11.2$   
489  $\pm 1.2^\circ$  (**Supplementary Figure 2C**), exhibited an average maximum torque of  $5.3 \pm 1.4$  Nm, and showed  
490 no evidence of expulsion during testing.

#### 491 492 **4. Discussion**

493 There is an important need for the development of injectable biomaterials that meet the  
494 requirements for NP replacement and repair. PNIPAAm is a promising biomaterial due to its gelation  
495 behavior between room and body temperature, but the homopolymer exhibits a low water content and  
496 poor elastic properties [67]. In previous work, we demonstrated that the polymerization of NIPAAm  
497 monomer in the presence of methacrylated CS yielded a graft copolymer (PNIPAAm-g-CS), which  
498 retained the thermosensitivity of PNIPAAm with improved water retention and compressive modulus  
499 [45]. Despite the improvements, the copolymer still exhibited water and volume loss over time, limited  
500 bioadhesive properties [46] and low solution viscosity below the LCST, characteristics identified as major  
501 obstacles to successful intradiscal implantation and biomechanical performance. Thus, in the current  
502 study, we sought to improve these properties by combining PNIPAAm-g-CS with calcium crosslinked  
503 alginate MPs to form a hydrogel composite. Structure-property relationships were investigated by varying  
504 MP size and concentration. By elucidating these relationships, we sought to also shed light on the  
505 mechanism by which MPs influence the rheological, swelling, and mechanical properties of *in situ*  
506 forming PNIPAAm-g-CS hydrogels.

507 In order to prepare the bioadhesive composite for this study, dry alginate MPs were suspended in  
508 aqueous solutions of PNIPAAm-g-CS immediately prior to gelation. We postulate that when the dry MPs



509 are suspended in solution, they begin to expand as they imbibe water and packed together to form a three-  
510 dimensional "jigsaw puzzle" within the PNIPAAm-g-CS network. This structure, discernable in the  
511 histological image in Figure 3, imparts resistance to deformation by providing a drag force within the  
512 polymer network, an effect that is evident in multiple experimental outcomes. For instance, in the  
513 rheological study, significant increases in  $G^*$  were observed for all the formulations containing MPs.  
514 Notably, the drag force increases with particle surface area. High concentrations of small MPs (S-50)  
515 induced greater increases in  $\eta^*$  and  $G^*$  compared to the same concentration of large MPs (L-50).  
516 Similarly, high concentrations of small MPs (S-50) resulted in a significant improvement in confined and  
517 unconfined compressive moduli after gelation compared to PNIPAAm-g-CS (P-0).

518 Alginate MPs impart tissue bonding capability to the hydrogel network. Mucoadhesion  
519 mechanisms of swellable polysaccharides have been widely reported [59, 68-70] and the principles are  
520 applicable in this system. As the alginate on the surface of the composite swells, the alginate chains  
521 become increasingly mobile and able to interact with the tissue components via hydrogen bonding, Van  
522 Der Waal forces, chain entanglement, and/or electrostatic interactions. Under tension, high concentrations  
523 of alginate MPs, whether small or large in diameter, performed equivalently, indicating that adhesive  
524 strength was primarily dependent on the amount of alginate present at the tissue interface. Likely, the drag  
525 force between particles is not induced with tensile loading. For all formulations except P-0, the magnitude  
526 of the adhesive strength was higher in shear than in tension. In shear, the flow of MP-containing hydrogel  
527 solutions into the tissue surface texture provides mechanical interlocking and a greater number of sites for  
528 bonding interactions with the tissue. This, combined with the drag force between particles, significantly  
529 improved mechanical performance of the adhesive. If the hydrogel were to expel through the AF needle  
530 tract, shear more closely mimics the mode of failure than tension, corresponding with our observation  
531 during the biomechanical studies that formulation P-0 extravasated from the porcine nuclear cavity after  
532 injection, whereas S-50 did not.

533 Since it outperformed the other formulations in terms of material properties, formulation S-50  
534 was the primary focus of the *in vitro* culture experiments. Our previous studies established the

535 biocompatibility of PNIPAAm-g-CS (formulation P-0) with encapsulated human embryonic kidney  
536 (HEK) 293 cells [45]. Clinical studies have reported improvements in Oswestry Disability Index (ODI)  
537 and Visual Analogue Scale (VAS) [71, 72] with bone marrow (BM) derived MSC injection into the IVD.  
538 However, adipose tissue, because of its relative abundance compared to bone marrow, may represent a  
539 more clinically feasible source for MSCs than bone marrow [73] and thus were selected for this study.  
540 After 14 days of culture *in vitro*, the survival and proliferation of ADMSCs encapsulated in S-50 was  
541 demonstrated with Live/Dead and alamarBlue results. Compared to P-0, ADMSCs proliferated more  
542 slowly in S-50, but nonetheless at least 90 % of ADMSCs remained viable in both formulations. We  
543 conjecture that the addition of MPs to the PNIPAAm-g-CS hydrogel imposed spatial constraints within  
544 the polymer network, limiting cell proliferation [74]. Similarly, ECM expressed by the cells appeared  
545 more striated in S-50 compared to P-0, so it is plausible that the crowding effect imposed by the MPs  
546 forced the alignment of the ECM into a more fibrous morphology. Overall, this study indicates that  
547 alginate MPs can be incorporated into PNIPAAm-g-CS networks without detrimental effects on  
548 encapsulated cells, but theoretically there is an upper limit for the concentration of MPs that can be used.

549 Gene expression and immunofluorescent staining of ADMSCs encapsulated in S-50 revealed the  
550 presence of several NP markers, which was expected, since GDF-6 has been reported to drive NP  
551 differentiation of ADMSCs [62]. Aggrecan gene expression was approximately 5 and 50 times higher  
552 than type II and type I collagen, respectively. Higher proportions of aggrecan to collagen (27:1) in the NP  
553 tissue of healthy adult discs has been previously reported in literature [75]. KRT19, FOXF1, and PAX1  
554 have been recently identified as novel NP markers and were among the highest upregulated cell-related  
555 genes [76-78]. CA12 and HIF1 $\alpha$  showed limited upregulation but are closely linked to hypoxia [79, 80], a  
556 microenvironmental condition that was not applied in this system.

557 Formulation S-50 was evaluated for its ability to restore the axial biomechanical behavior of a  
558 porcine IVD motion segment and resist expulsion through the needle tract in the AF. The porcine IVD has  
559 been used to model that of the human in terms of stress distributions with loading [81] and herniation  
560 behavior with flexion/extension and compression [82, 83]. Porcine IVDs have a soft nucleus pulposus,

561 with a reported toe region modulus of 1.1 kPa [84], making it possible to denucleate through a needle  
562 attached to vacuum. Thus, we were able to induce the immediate formation of an NP cavity with minimal  
563 damage to the AF. Bovine caudal IVDs are used in currently reported *ex vivo* biomechanical studies [64,  
564 85, 86], but the NP of this species is stiffer than that of porcine. Mechanical denucleation of bovine IVDs  
565 necessitates rongeurs, inflicting more damage to the AF than what was aimed for in this NP replacement  
566 study. Minimally invasive denucleation of bovine IVDs can be achieved by enzyme injection [5, 87-89],  
567 but digestion requires a culture period of several days with removal of vertebral body bone to preserve  
568 cell viability. Thus, porcine was chosen as the model for preliminary evaluation of biomaterial  
569 biomechanical performance, although further evaluation should be performed in other species, such as  
570 bovine.

571 Nucleotomy caused decreases in NZ stiffness and increases in ROM, an expected outcome since  
572 the NP plays a significant role in limiting axial deformation under low loads [13, 90, 91]. Compressive  
573 stiffness of the motion segments, a parameter measured at high loads, trended upwards with nucleotomy  
574 and mechanical degeneration as a result of the transfer of load to the stiffer IVD components [19].  
575 Hydrogel implantation restored these biomechanical parameters to the intact state, a promising  
576 preliminary indication of the functional behavior of the composite. Yet, the hydrogel design still needs  
577 optimization for clinical translation. For instance, the mechanical properties of PNIPAAm-g-CS + MPs  
578 likely need to be increased to overlap with levels of the human. Formulation S-50, with an average  
579 unconfined compressive modulus of 2.7 kPa, is weaker than native NP tissue, ranging from 3 – 5 kPa  
580 [92]. The same formulation exhibited an average confined compressive modulus of 893 kPa, only  
581 approaching the native NP tissue value of 1 MPa [93]. Last, with complex moduli  $G^*$  between 1.4 to 3.5  
582 kPa, S-50 fell short of mimicking the  $G^*$  of the native NP in the same frequency range, 7.4 to 19.8 kPa  
583 [66].

584 Another important consideration is that the material behavior of PNIPAAm-g-CS + MPs is likely  
585 to change over time. Water is known to act as a plasticizer in hydrogels [94], but the swelling kinetics of  
586 PNIPAAm-g-CS + MPs *in situ* will depend on osmotic pressure of the surrounding tissues [95]. Alginate

587 dissolution will induce a loss of mechanical reinforcement and adhesion strength, but the rate at which  
588 this occurs depends on the ion concentration in the milieu surrounding the biomaterial [96].  
589 Simultaneously, encapsulated cells will remodel the hydrogel network and secrete ECM [97, 98], also  
590 impacting hydrogel properties over time. Human or bovine IVD organ culture models [99-101] are the  
591 most appropriate tools for ascertaining long term hydrogel behavior within the context of an IVD-mimetic  
592 osmotic pressure, biochemical composition, and biomolecular microenvironment. While such studies are  
593 out of the scope of the current work, it is exciting to note that the two phases in the PNIPAAm-g-CS +  
594 MP composite system can be modified to tune short and long-term behavior. For the MP phase,  
595 increasing alginate concentration would slow MP dissolution [59], prolonging mechanical performance  
596 and bioadhesive interactions with the tissue. Another option to improve the long term bioadhesive  
597 stability of the system is to employ a recently reported two-part repair strategy [102], where a chemically-  
598 functionalized polymer layer would be placed between the bulk phase (in this case, PNIPAAm-g-CS) and  
599 surrounding AF, covalently linking the bulk phase to the tissue interface.

600 Despite the need for continued development, we posit that we have developed a useful platform  
601 for IVD tissue engineering. The concept of encapsulating re-hydrating polysaccharide-based MPs within  
602 a hydrogel structure can have important utility beyond the scope of this study, such as the controlled  
603 delivery of bioactive molecules for improving regenerative outcomes. From a broader perspective, we  
604 posit that the concept can be applied for improving the properties of *in situ* forming cell carriers in a  
605 variety of regenerative orthopaedic applications.

606

## 607 **5. Conclusion**

608 The inclusion of alginate MPs within PNIPAAm-g-CS networks is an effective method of  
609 increasing initial injectability, bioadhesive interactions, and mechanical performance. Gene expression,  
610 histology and immunohistochemistry results indicate that networks comprised of PNIPAAm-g-CS +  
611 alginate MPs supports differentiation to an NP phenotype. When implanted *ex vivo* into the intradiscal  
612 cavity of degenerated porcine IVDs, PNIPAAm-g-CS + alginate MPs restores the compressive and NZ

613 stiffnesses to intact values. The composite also resists expulsion under tension-compression and lateral  
614 bending. Based on these results, we conclude that PNIPAAm-g-CS + alginate MPs has promise as an  
615 injectable system for NP replacement and regeneration and warrants further investigation.

616

#### 617 **Acknowledgements**

618 The work in this publication was supported by the National Institute of Arthritis and  
619 Musculoskeletal and Skin Diseases and the National Institute of Biomedical Imaging and Bioengineering  
620 of the National Institutes of Health under Award Number 1R15 AR 063920-01 and by the New Jersey  
621 Health Foundation under Award Number PC-2316. The content is solely the responsibility of the authors  
622 and does not necessarily represent the official views of the National Institutes of Health or the New Jersey  
623 Health Foundation.

624

#### 625 **Conflict of Interest**

626 The authors have no conflicts of interest to declare.

627

#### 628 **Authors' Contributions**

629 T.C, K.D., J.K., C.I, and A.J.V. designed the research. T.C. performed the experiments. A.J.V. supplied  
630 the materials. T.C., A.J.V., J.K., C.I., and K.M. analyzed the data. A.J.V. and T.C. wrote the manuscript  
631 and all authors revised.

632

#### 633 **Data Availability Statement**

634 The processed data required to reproduce these findings are available by contacting the authors.

635

636 **References**

- 637 1. Hoy, D., et al., *The global burden of low back pain: estimates from the Global Burden of Disease*  
638 *2010 study*. *Annals of the rheumatic diseases*, 2014. **73**(6): p. 968-977.
- 639 2. Rubin, D.I., *Epidemiology and risk factors for spine pain*. *Neurologic clinics*, 2007. **25**(2): p.  
640 353-371.
- 641 3. Maniadakis, N. and A. Gray, *The economic burden of back pain in the UK*. *Pain*, 2000. **84**: p. 1.
- 642 4. Hartvigsen, J., et al., *What low back pain is and why we need to pay attention*. *The Lancet*, 2018.  
643 **391**(10137): p. 2356-2367.
- 644 5. Adams, M.A. and P. Dolan, *Intervertebral disc degeneration: evidence for two distinct*  
645 *phenotypes*. *Journal of anatomy*, 2012. **221**(6): p. 497-506.
- 646 6. Ohtori, S., et al., *Pathomechanisms of discogenic low back pain in humans and animal models*.  
647 *The spine journal*, 2015. **15**(6): p. 1347-1355.
- 648 7. Melrose, J., P. Ghosh, and T.K. Taylor, *A comparative analysis of the differential spatial and*  
649 *temporal distributions of the large (aggrecan, versican) and small (decorin, biglycan,*  
650 *fibromodulin) proteoglycans of the intervertebral disc*. *Journal of Anatomy*, 2001. **198**(1): p. 3-  
651 15.
- 652 8. Marchand, F. and A.M. Ahmed, *Investigation of the laminar structure of lumbar disc anulus*  
653 *fibrosus*. *Spine*, 1990. **15**(5): p. 402-410.
- 654 9. Di Martino, A., et al., *Nucleus pulposus replacement: basic science and indications for clinical*  
655 *use*. *Spine*, 2005. **30**(16S): p. S16-S22.
- 656 10. Le Maitre, C.L., et al., *Matrix synthesis and degradation in human intervertebral disc*  
657 *degeneration*. *Biochemical Society Transactions* 2007. **35**: p. 652-655.
- 658 11. Freemont, A.J., et al., *Nerve growth factor expression and innervation of the painful*  
659 *intervertebral disc*. *The Journal of pathology*, 2002. **197**(3): p. 286-292.
- 660 12. Adams, M.A. and P.J. Roughley, *What is intervertebral disc degeneration, and what causes it?*  
661 *Spine*, 2006. **31**(18): p. 2151-2161.
- 662 13. Iatridis, J.C., et al., *Role of biomechanics in intervertebral disc degeneration and regenerative*  
663 *therapies: what needs repairing in the disc and what are promising biomaterials for its repair?*  
664 *The Spine Journal*, 2013. **13**(3): p. 243-262.
- 665 14. Fujii, K., et al., *Discogenic back pain: literature review of definition, diagnosis, and treatment*.  
666 *JBMR plus*, 2019. **3**(5): p. e10180.
- 667 15. Shi, H., et al., *Radiological risk factors for recurrent lumbar disc herniation after percutaneous*  
668 *transforaminal endoscopic discectomy: a retrospective matched case-control study*. *European*  
669 *Spine Journal*, 2021: p. 1-7.
- 670 16. Shin, E.H., et al., *Risk factors for recurrent lumbar disc herniation after discectomy*. *International*  
671 *orthopaedics*, 2019. **43**(4): p. 963-967.
- 672 17. Chen, G.Y., et al., *Multiple factors influencing the postoperative recurrence of lumbar disc*  
673 *herniation treated with lumbar discectomy*. *Chinese Journal of Bone and Joint*, 2018. **7**(6): p.  
674 437-441.
- 675 18. Wilke, H.J., et al., *New in vivo measurements of pressures in the intervertebral disc in daily life*.  
676 *Spine*, 1999. **24**(8): p. 755-762.
- 677 19. Varma, D.M., et al., *Thermoresponsive, redox-polymerized cellulosic hydrogels undergo in situ*  
678 *gelation and restore intervertebral disc biomechanics post discectomy*. *European cells &*  
679 *materials*, 2018. **35**: p. 300.
- 680 20. Reitmaier, S., et al., *Hydrogels for nucleus replacement—facing the biomechanical challenge.*  
681 *Journal of the mechanical behavior of biomedical materials*. *Journal of the mechanical behavior*  
682 *of biomedical materials*, 2012. **14**: p. 67-77.
- 683 21. Bowles, R.D. and L.A. Setton, *Biomaterials for intervertebral disc regeneration and repair*.  
684 *Biomaterials*, 2017. **129**: p. 54-67.



- 685 22. Vadalà, G., et al., *Mesenchymal stem cells injection in degenerated intervertebral disc: cell*  
686 *leakage may induce osteophyte formation*. Journal of tissue engineering and regenerative  
687 medicine, 2012. **6**(5): p. 348-355.
- 688 23. Bertram, H., et al., *Matrix-assisted cell transfer for intervertebral disc cell therapy*. Biochemical  
689 and biophysical research communications, 2005. **331**(4): p. 1185-1192.
- 690 24. Zhou, X., et al., *Injectable decellularized nucleus pulposus-based cell delivery system for*  
691 *differentiation of adipose-derived stem cells and nucleus pulposus regeneration*. Acta  
692 biomaterialia., 2018. **81**: p. 115-128.
- 693 25. Yu, L., et al., *Thermosensitive injectable decellularized nucleus pulposus hydrogel as an ideal*  
694 *biomaterial for nucleus pulposus regeneration*. Journal of biomaterials applications, 2020. **35**(2):  
695 p. 182-192.
- 696 26. Kalaf, E.A.G., et al., *Characterization and restoration of degenerated IVD function with an*  
697 *injectable, in situ gelling alginate hydrogel: An in vitro and ex vivo study*. Journal of the  
698 mechanical behavior of biomedical materials, 2017. **72**: p. 229-240.
- 699 27. Collin, E.C., et al., *An injectable vehicle for nucleus pulposus cell-based therapy*. Biomaterials,  
700 2011. **32**(11): p. 2862-2870.
- 701 28. Priyadarshani, P., et al., *Injectable hydrogel provides growth-permissive environment for human*  
702 *nucleus pulposus cells*. Journal of Biomedical Materials Research Part A, 2016. **104**(2): p. 419-  
703 426.
- 704 29. Cloyd, J.M., et al., *Material properties in unconfined compression of human nucleus pulposus,*  
705 *injectable hyaluronic acid-based hydrogels and tissue engineering scaffolds*. European Spine  
706 Journal, 2007. **16**(11): p. 1892-1898.
- 707 30. Pérez-San Vicente, A., et al., *Self-healing dynamic hydrogel as injectable shock-absorbing*  
708 *artificial nucleus pulposus*. Biomacromolecules, 2017. **18**(8): p. 2360-2370.
- 709 31. Suryandaru, H.V., et al., *Alginate/PVA/chitosan injection composites as scaffold material for*  
710 *nucleus pulposus regeneration*. IOP Conference Series: Earth and Environmental Science, 2021.  
711 **649**(February): p. 012019.
- 712 32. Colombini, A., et al., *Fibrin in intervertebral disc tissue engineering*. Tissue Engineering Part B:  
713 Reviews, 2014. **20**(6): p. 713-721.
- 714 33. Malafaya, P.B., G.A. Silva, and R.L. Reis, *Natural-origin polymers as carriers and scaffolds for*  
715 *biomolecules and cell delivery in tissue engineering applications*. Advanced drug delivery  
716 reviews, 2007. **59**(4-5): p. 207-233.
- 717 34. Janmey, P.A., J.P. Winer, and J.W. Weisel, *Fibrin gels and their clinical and bioengineering*  
718 *applications*. Journal of the Royal Society Interface, 2009. **6**(30): p. 1-10.
- 719 35. Kjaergard, H.K. and U.S. Weis-Fogh, *Important factors influencing the strength of autologous*  
720 *fibrin glue; the fibrin concentration and reaction time-comparison of strength with commercial*  
721 *fibrin glue*. European surgical research, 1994. **26**(5): p. 273-276.
- 722 36. Siedentop, K.H., D.M. Harris, and B. Sanchez, *Autologous fibrin tissue adhesive: factors*  
723 *influencing bonding power*. The Laryngoscope, 1988. **98**(7): p. 731-733.
- 724 37. Sierra, D.H., et al., *A method to determine shear adhesive strength of fibrin sealants*. Journal of  
725 Applied Biomaterials, 1992. **3**(2): p. 147-151.
- 726 38. Roberts, I.V., et al., *Fibrin matrices as (injectable) biomaterials: formation, clinical use, and*  
727 *molecular engineering*. Macromolecular bioscience, 2020. **20**(1): p. 1900283.
- 728 39. Cruz, M.A., et al., *Structural and chemical modification to improve adhesive and material*  
729 *properties of fibrin-genipin for repair of annulus fibrosus defects in intervertebral disks*. Journal  
730 of biomechanical engineering. 139, 2017. **8**.
- 731 40. Guterl, C.C., et al., *Characterization of mechanics and cytocompatibility of fibrin-genipin*  
732 *annulus fibrosus sealant with the addition of cell adhesion molecules*. Tissue Engineering Part A,  
733 2014. **20**(17-18): p. 2536-2545.

- 734 41. Wang, C., et al., *Cytocompatibility study of a natural biomaterial crosslinker—Genipin with*  
735 *therapeutic model cells*. Journal of Biomedical Materials Research Part B: Applied Biomaterials,  
736 2011. **97**(1): p. 58-65.
- 737 42. Shanmugam, M.K., et al., *Potential role of genipin in cancer therapy*. Pharmacological research,  
738 2018. **133**: p. 195-200.
- 739 43. Cruz, M.A., et al., *Cell-seeded adhesive biomaterial for repair of annulus fibrosus defects in*  
740 *intervertebral discs*. Tissue Engineering Part A, 2018. **24**(3-4): p. 187-198.
- 741 44. Behrendt, P., et al., *Articular Joint-Simulating Mechanical Load Activates Endogenous TGF- $\beta$  in*  
742 *a Highly Cellularized Bioadhesive Hydrogel for Cartilage Repair*. The American Journal of  
743 Sports Medicine, 2020. **48**(1): p. 210-221.
- 744 45. Wiltsey, C., et al., *Characterization of injectable hydrogels based on poly (N-*  
745 *isopropylacrylamide)-g-chondroitin sulfate with adhesive properties for nucleus pulposus tissue*  
746 *engineering*. Journal of Materials Science: Materials in Medicine, 2013. **24**(2): p. 837-847.
- 747 46. Wiltsey, C., et al., *Thermogelling bioadhesive scaffolds for intervertebral disk tissue engineering:*  
748 *preliminary in vitro comparison of aldehyde-based versus alginate microparticle-mediated*  
749 *adhesion*. Acta biomaterialia, 2015. **16**: p. 71-80.
- 750 47. Mueller, S., E.W. Llewellyn, and H.M. Mader, *The rheology of suspensions of solid particles*.  
751 Proceedings of the Royal Society A: Mathematical, Physical and Engineering Sciences, 2010.  
752 **466**: p. 1201-1228.
- 753 48. Clausen, J.R., D.A. Reasor, and C.K. Aidun, *The rheology and microstructure of concentrated*  
754 *non-colloidal suspensions of deformable capsules*. Journal of Fluid Mechanics, 2011. **685**: p. 202.
- 755 49. Krüger, T., B. Kaoui, and J. Harting, *Interplay of inertia and deformability on rheological*  
756 *properties of a suspension of capsules*. Journal of Fluid Mechanics, 2014. **751**: p. 725-745.
- 757 50. Olhero, S.M. and J.M.F. Ferreira, *Influence of particle size distribution on rheology and particle*  
758 *packing of silica-based suspensions*. Powder Technology, 2004. **139**(1): p. 69-75.
- 759 51. Serrero, A., et al., *Polysaccharide-based adhesive for biomedical applications: correlation*  
760 *between rheological behavior and adhesion*. Biomacromolecules, 2011. **12**(5): p. 1556-1566.
- 761 52. Qi, X., et al., *Intra-articular administration of chitosan thermosensitive in situ hydrogels*  
762 *combined with diclofenac sodium-loaded alginate microspheres*. Journal of pharmaceutical  
763 sciences, 2016. **105**(1): p. 122-130.
- 764 53. Xing, L., et al., *Covalently polysaccharide-based alginate/chitosan hydrogel embedded alginate*  
765 *microspheres for BSA encapsulation and soft tissue engineering*. International Journal of  
766 Biological Macromolecules, 2019. **127**: p. 340-348.
- 767 54. Hsieh, T.H., et al., *The toughness of epoxy polymers and fibre composites modified with rubber*  
768 *microparticles and silica nanoparticles*. Journal of Materials Science: Materials in Medicine,  
769 2010. **45**(5): p. 1193-1210.
- 770 55. DeVolder, R.J., et al., *Modulating the rigidity and mineralization of collagen gels using poly*  
771 *(lactic-co-glycolic acid) microparticles*. Tissue Engineering Part A, 2012. **18**(15-16): p. 1642-  
772 1651.
- 773 56. Pereira, D.R., et al., *Development of gellan gum-based microparticles/hydrogel matrices for*  
774 *application in the intervertebral disc regeneration*. Tissue Engineering Part C: Methods, 2011.  
775 **17**(10): p. 961-972.
- 776 57. Piluso, S., et al., *Engineered Three-Dimensional Microenvironments with Starch Nanocrystals as*  
777 *Cell-Instructive Materials*. Biomacromolecules, 2019. **20**(10): p. 3819-3830.
- 778 58. Bajpai, R., A. Prokop, and M. Zappi, *Algal Biorefineries: Cultivation of cells and products (Vol.*  
779 *1)*. 2013: Springer Science & Business Media.
- 780 59. Szymańska, E., et al., *Vaginal chitosan tablets with clotrimazole—design and evaluation of*  
781 *mucoadhesive properties using porcine vaginal mucosa, mucin and gelatine*. Chemical and  
782 Pharmaceutical Bulletin, 2014. **62**(2): p. 160-167.
- 783 60. Shtenberg, Y., et al., *Mucoadhesive alginate pastes with embedded liposomes for local oral drug*  
784 *delivery*. International journal of biological macromolecules, 2018. **111**: p. 62-69.



- 785 61. Christiani, T., et al. *Microparticle-mediated adhesion of thermogelling scaffold for intervertebral*  
786 *disc tissue engineering*. in *Society for Biomaterials Annual Meeting*. 2014. Denver, CO.
- 787 62. Clarke, L.E., et al., *Growth differentiation factor 6 and transforming growth factor-beta*  
788 *differentially mediate mesenchymal stem cell differentiation, composition, and micromechanical*  
789 *properties of nucleus pulposus constructs*. *Arthritis Res Ther*, 2014. **16**.
- 790 63. Cannella, M., et al., *The role of the nucleus pulposus in neutral zone human lumbar*  
791 *intervertebral disc mechanics*. *Journal of biomechanics*, 2008. **41**(10): p. 2104-2111.
- 792 64. Hom, W.W., et al., *Composite biomaterial repair strategy to restore biomechanical function and*  
793 *reduce herniation risk in an ex vivo large animal model of intervertebral disc herniation with*  
794 *varying injury severity*. *PloS one*, 2019. **14**(5): p. e0217357.
- 795 65. Gullbrand, S.E., et al., *A large animal model that recapitulates the spectrum of human*  
796 *intervertebral disc degeneration*. *Osteoarthritis and cartilage*, 2017. **25**(1): p. 146-156.
- 797 66. Iatridis, J.C., et al., *The viscoelastic behavior of the non-degenerate human lumbar nucleus*  
798 *pulposus in shear*. *Journal of biomechanics*, 1997. **30**(10): p. 1005-1013.
- 799 67. Vernengo, A., et al., *Evaluation of novel injectable hydrogels for nucleus pulposus replacement*.  
800 *Journal of Biomedical Materials Research Part B: Applied Biomaterials*, 2008. **84**(1): p. 64-69.
- 801 68. Cho, W.J., S.H. Oh, and J.H. Lee, *Alginate film as a novel post-surgical tissue adhesion barrier*.  
802 *Journal of Biomaterials Science Polymer Edition*, 2010. **21**(6-7): p. 701-713.
- 803 69. Davidovich-Pinhas, M., O. Harari, and H. Bianco-Peled, *Evaluating the mucoadhesive properties*  
804 *of drug delivery systems based on hydrated thiolated alginate*. *Journal of Controlled Release*,  
805 2009. **136**(1): p. 38-44.
- 806 70. Neemann, F., et al., *Non-covalent protein-polysaccharide interactions and their influence on*  
807 *membrane fouling*. *Journal of membrane science*, 2013. **446**: p. 310-317.
- 808 71. Bae, H.W., et al., *A phase II study demonstrating efficacy and safety of mesenchymal precursor*  
809 *cells in low back pain due to disc degeneration*. *The Spine Journal*, 2014. **14**(11): p. S31-S32.
- 810 72. Pettine, K.A., et al., *Autologous bone marrow concentrate intradiscal injection for the treatment*  
811 *of degenerative disc disease with three-year follow-up*. *International orthopaedics*, 2017. **41**(10):  
812 p. 2097-2103.
- 813 73. Hoogendoorn, R.J.W., et al., *Adipose stem cells for intervertebral disc regeneration: current*  
814 *status and concepts for the future*. 12, 2008. **6a**(2205-2216).
- 815 74. Streichan, S.J., et al., *Spatial constraints control cell proliferation in tissues*. *Proc Natl Acad Sci*  
816 *U S A*, 2014. **111**(15): p. 5586-91.
- 817 75. Mwale, F., *Molecular therapy for disk degeneration and pain*. *Global Spine J*, 2013. **3**(3): p. 185-  
818 92.
- 819 76. Ly, F., et al., *In search of nucleus pulposus-specific molecular markers*. *Rheumatology (Oxford)*,  
820 2014. **53**: p. 600-610.
- 821 77. Thorpe, A.A., et al., *Nucleus pulposus phenotypic markers to determine stem cell differentiation:*  
822 *fact or fiction?* *Oncotarget*, 2016. **7**(3): p. 2189-200.
- 823 78. Minogue, B.M., et al., *Characterization of the human nucleus pulposus cell phenotype and*  
824 *evaluation of novel marker gene expression to define adult stem cell differentiation*. *Arthritis*  
825 *Rheum*, 2010. **62**(12): p. 3695-705.
- 826 79. Stoyanov, J.V., et al., *Role of hypoxia and growth and differentiation factor-5 on differentiation*  
827 *of human mesenchymal stem cells towards intervertebral nucleus pulposus-like cells*. *Eur Cell*  
828 *Mater*, 2011. **21**: p. 533-47.
- 829 80. Thorpe, A.A., et al., *Thermally triggered injectable hydrogel, which induces mesenchymal stem*  
830 *cell differentiation to nucleus pulposus cells: Potential for regeneration of the intervertebral disc*.  
831 *Acta Biomater*, 2016. **36**: p. 99-111.
- 832 81. van Deursen, D.L., et al., *In vitro torsion-induced stress distribution changes in porcine*  
833 *intervertebral discs*. *Spine*, 2001. **26**(23): p. 2582-2586.

- 834 82. Callaghan, J.P. and S.M. McGill, *Intervertebral disc herniation: studies on a porcine model*  
835 *exposed to highly repetitive flexion/extension motion with compressive force*. *Clinical*  
836 *Biomechanics*, 2001. **16**(1): p. 28-37.
- 837 83. Balkovec, C. and S. McGill, *Extent of nucleus pulposus migration in the annulus of porcine*  
838 *intervertebral discs exposed to cyclic flexion only versus cyclic flexion and extension*. *Clinical*  
839 *Biomechanics*, 2012. **27**(8): p. 766-770.
- 840 84. Mercuri, J.J., S.S. Gill, and D.T. Simionescu, *Novel tissue-derived biomimetic scaffold for*  
841 *regenerating the human nucleus pulposus*. *Journal of biomedical materials research Part A*, 2011.  
842 **96**(2): p. 422-435.
- 843 85. Vergari, C., et al., *Lamellar and fibre bundle mechanics of the annulus fibrosus in bovine*  
844 *intervertebral disc*. *Acta biomaterialia*, 2016. **37**: p. 14-20.
- 845 86. Yang, J.J., et al., *Intervertebral disc needle puncture injury can be repaired using a gelatin-poly*  
846 *( $\gamma$ -glutamic acid) hydrogel: an in vitro bovine biomechanical validation*. *European Spine Journal*,  
847 2018. **27**(10): p. 2631-2638.
- 848 87. Chan, S.C., et al., *Papain-induced in vitro disc degeneration model for the study of injectable*  
849 *nucleus pulposus therapy*. *The Spine Journal*, 2013. **13**(3): p. 273-283.
- 850 88. Rustenburg, C.M.E., et al., *Modelling the catabolic environment of the moderately degenerated*  
851 *disc with a caprine ex vivo loaded disc culture system*. *European cells & materials*, 2020. **40**: p.  
852 21-37.
- 853 89. Paul, C.P., et al., *Changes in intervertebral disk mechanical behavior during early degeneration*.  
854 *Journal of biomechanical engineering*, 2018. **140**(9): p. 1-9.
- 855 90. Johannessen, W., et al., *Trans-endplate nucleotomy increases deformation and creep response in*  
856 *axial loading*. *Annals of biomedical engineering*, 2006. **34**(4): p. 687-696.
- 857 91. Panjabi, M.M. and A.A. White III, *Basic biomechanics of the spine*. *Neurosurgery*, 1980. **7**(1): p.  
858 76-93.
- 859 92. Cloyd, J.M., et al., *Material properties in unconfined compression of human nucleus pulposus,*  
860 *injectable hyaluronic acid-based hydrogels and tissue engineering scaffolds*. *European spine*  
861 *journal*, 2007. **16**(11): p. 1892-1898.
- 862 93. Johannessen, W. and D.M. Elliott, *Effects of degeneration on the biphasic material properties of*  
863 *human nucleus pulposus in confined compression*. *Spine*, 2005. **30**(24): p. E724-E729.
- 864 94. Quinn, F.X., et al., *Water in hydrogels. 1. A study of water in poly (N-vinyl-2-pyrrolidone/methyl*  
865 *methacrylate) copolymer*. *Macromolecules*, 1988. **21**(11): p. 3191-3198.
- 866 95. Urban, J.P.G. and J.F. McMullin, *Swelling pressure of the intervertebral disc: influence of*  
867 *proteoglycan and collagen contents*. *Biorheology*, 1985. **22**(2): p. 145-157.
- 868 96. Ju, H.K., et al., *pH/temperature-responsive semi-IPN hydrogels composed of alginate and poly*  
869 *(N-isopropylacrylamide)*. *Journal of applied polymer science*, 2002. **83**(5): p. 1128-1139.
- 870 97. Loebel, C., R.L. Mauck, and J.A. Burdick, *Local nascent protein deposition and remodelling*  
871 *guide mesenchymal stromal cell mechanosensing and fate in three-dimensional hydrogels*. *Nature*  
872 *materials*, 2019. **18**(8): p. 883-891.
- 873 98. Ferreira, S.A., et al., *Bi-directional cell-pericellular matrix interactions direct stem cell fate*.  
874 *Nature communications*, 2018. **9**(1): p. 1-12.
- 875 99. Pfannkuche, J.J., et al., *Intervertebral disc organ culture for the investigation of disc pathology*  
876 *and regeneration—benefits, limitations, and future directions of bioreactors*. *Connective tissue*  
877 *research*, 2020. **61**(3-4).
- 878 100. Rosenzweig, D.H., et al., *Thermoreversible hyaluronan-hydrogel and autologous nucleus*  
879 *pulposus cell delivery regenerates human intervertebral discs in an ex vivo, physiological organ*  
880 *culture model*. *European Cells & Materials*, 2018. **36**: p. 200-217.
- 881 101. Lang, G., et al., *An intervertebral disc whole organ culture system to investigate proinflammatory*  
882 *and degenerative disc disease condition*. *Journal of tissue engineering and regenerative medicine*,  
883 2018. **12**(4): p. e2051-e2061.

- 884 102. DiStefano, T.J., et al., *Development of a two-part biomaterial adhesive strategy for annulus*  
885 *fibrosus repair and ex vivo evaluation of implant herniation risk*. *Biomaterials*, 2020. **258**: p.  
886 120309.  
887  
888

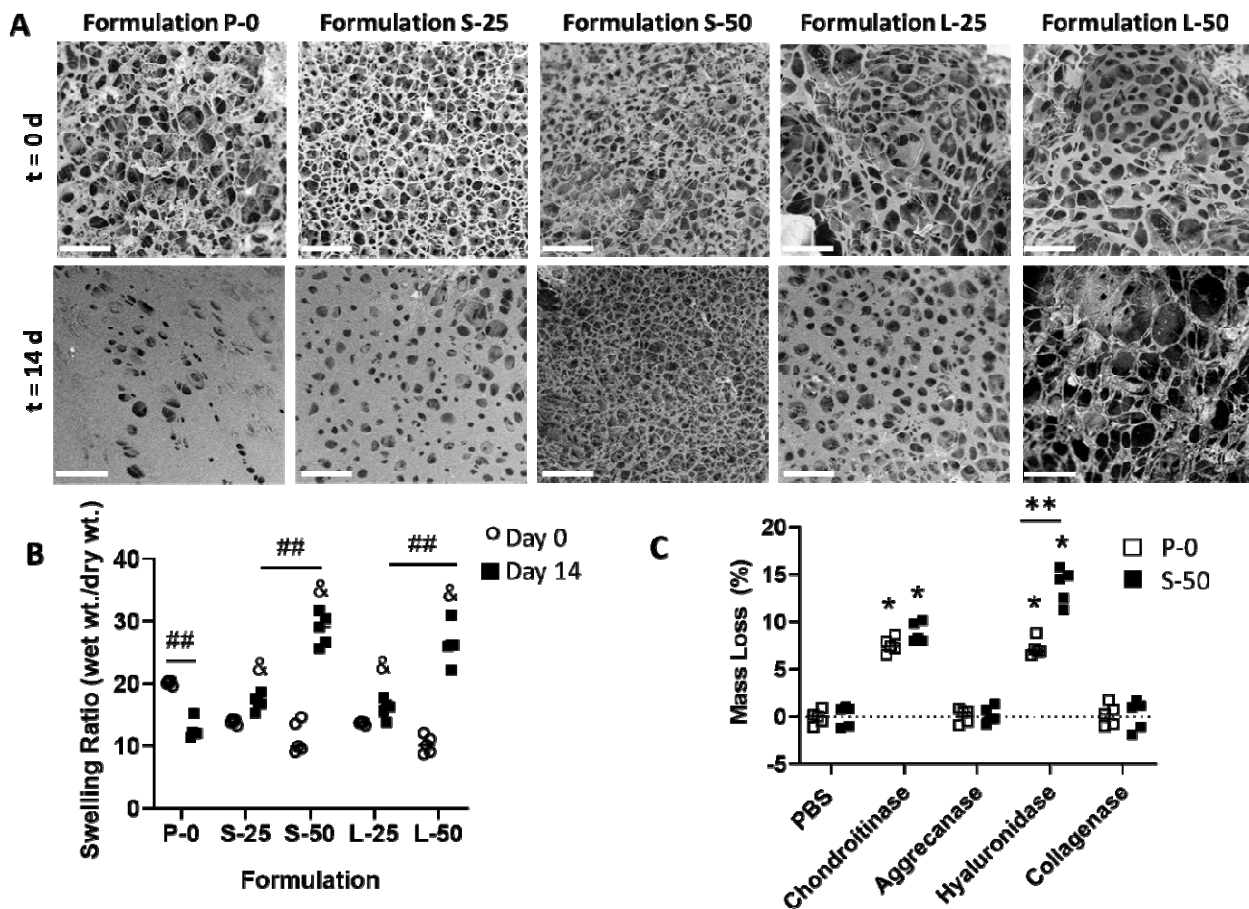

889  
 890 **Figure 1.** (A) Representative SEM images of formulations incubated in PBS at 37 °C after 0 and 14 days.  
 891 Scale bars = 50 μm. (B) Swelling ratios of formulations incubated in PBS at 37 °C at day 0 and 14. The  
 892 ampersand (&) indicates significantly different swelling ratio compared to P-0 at day 14 (p < 0.05). The  
 893 double hash symbol (##) indicates significantly different swelling ratio between two formulations or time  
 894 points (p < 0.05). (C) Degradation behavior of formulations P-0 and S-50 at 7 days immersion in PBS or  
 895 various enzymatic solutions. The asterisk (\*) indicates statistically significant mass loss (p < 0.05)  
 896 compared to PBS control. The double asterisks (\*\*) indicate a significant difference in mass loss between  
 897 P-0 and S-50 (p < 0.05).

898  
 899

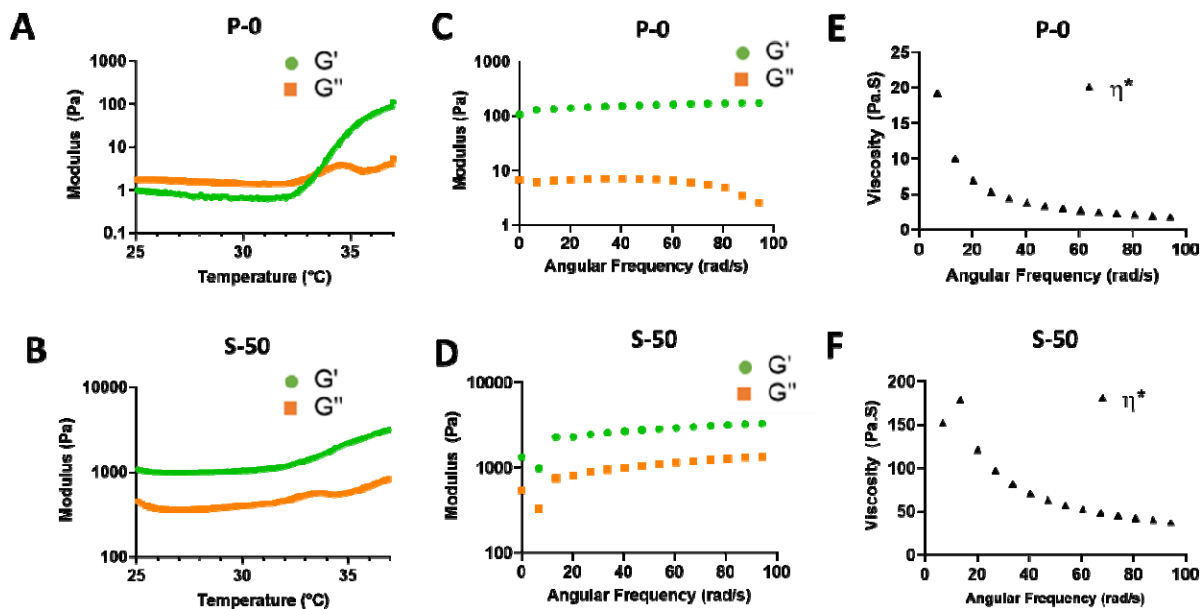

900

901 **Figure 2.** Representative rheological plots of formulations P-0 and S-50. (A, B) Temperature sweeps  
902 from 25 to 37°C at 1 °C/min and a constant 1 % strain and 1 Hz frequency. Whereas P-0 exhibited a gel  
903 point at 33°C, identified by the G' and G'' crossover, S-50 did not, indicating predominantly elastic  
904 behavior over the entire temperature range due to alginate MP incorporation. (C, D) Frequency sweeps  
905 from 0.01 to 15 Hz at a constant 1 % strain and temperature of 37 °C. Formulation S-50 exhibited higher  
906 values for G' than P-0, signifying a higher degree of elastic behavior. (E,F) Frequency sweeps at 37 °C  
907 revealed a higher overall viscosity  $\eta^*$  for S-50 than P-0, although both formulations exhibited decreasing  
908  $\eta^*$  at higher frequencies.

909

910



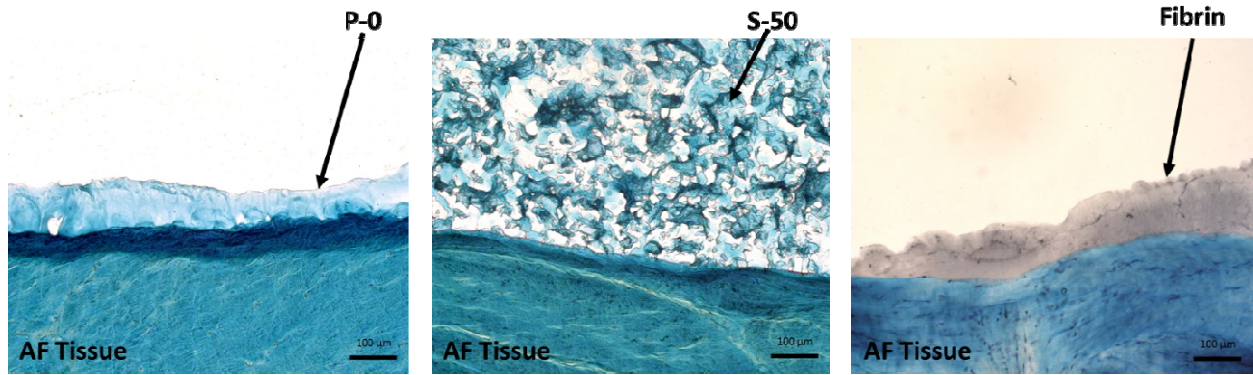

911

912 **Figure 3.** Histological staining of formulations P-0, S-50, and fibrin control applied along the porcine  
913 inner AF tissue substrate before adhesion testing. Tissue and biomaterials were stained with alcian blue  
914 and cell nuclei counterstained with Weigert's hematoxylin. Formulation S-50, with the three-dimensional  
915 network of alginate microparticles, retained its shape when applied over the tissue surface, as opposed to  
916 P-0 and fibrin, which spread easily. Scale bars = 100 µm.  
917

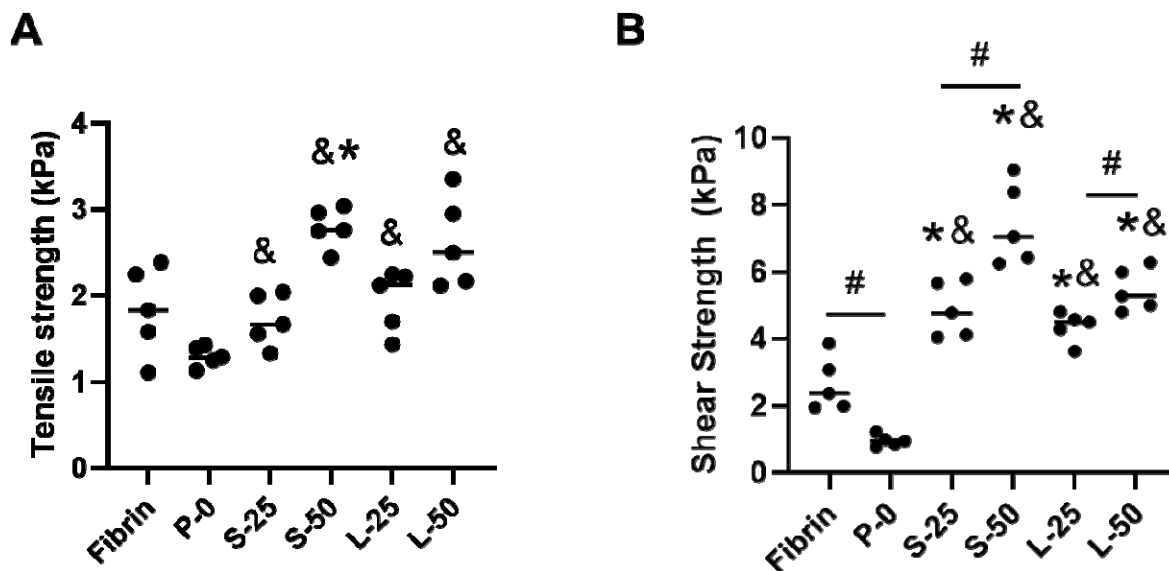

918

919 **Figure 4.** Adhesive strength of the formulations in tension (A) and shear (B) to inner AF tissue at 37 °C.  
920 An asterisk (\*) indicates a statistically significant difference ( $p < 0.05$ ) compared to fibrin. An ampersand  
921 (&) indicates significant difference ( $p < 0.05$ ) relative to P-0. A hash symbol (#) indicates a significant  
922 difference between formulations ( $p < 0.05$ ). Comparatively among all the formulations, S-50 exhibited  
923 high adhesion strength in both loading modes.  
924

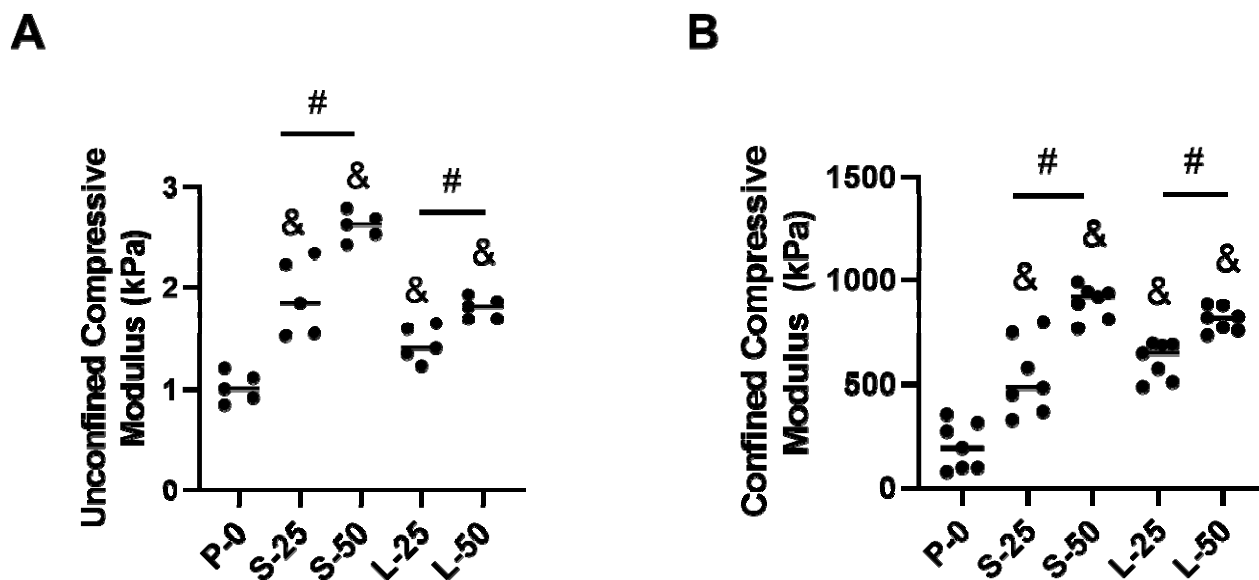

925

926 **Figure 5.** Stiffness of the formulations at 25% strain under unconfined (A) and confined (B) compression  
927 at 37 °C. An ampersand (&) indicates significant difference ( $p < 0.05$ ) relative to P-0. A hash symbol (#)  
928 indicates a significant difference between formulations ( $p < 0.05$ ). Comparatively among all the  
929 formulations, S-50 exhibited high compressive strength.

930

931



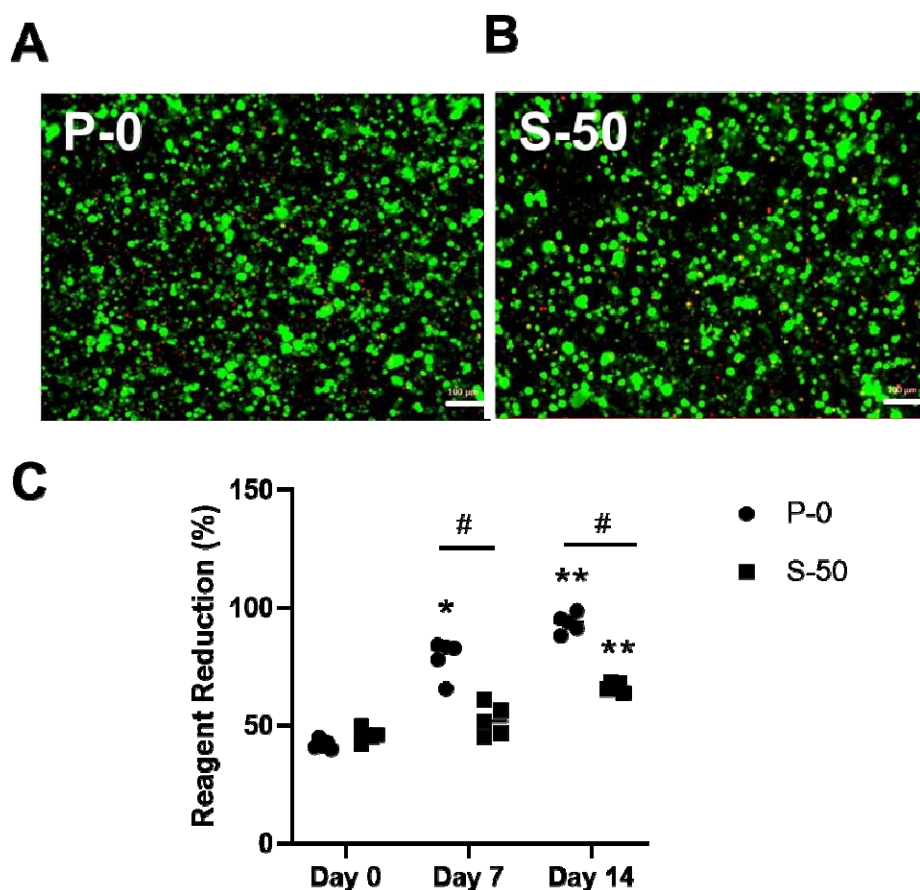

932

933 **Figure 6.** Representative Live/Dead images illustrating the viability of ADMSCs cultured for 14 days  
934 within formulation (A) P-0 or (B) S-50. Living and dead cells are shown in green and red, respectively.  
935 Scale bars = 100 μm. (C) Reagent reduction values calculated from alamarBlue assay results indicating the  
936 metabolic activity of ADMSCs on days 0, 7, and 14 (n=5). An asterisk (\*) indicates a statistically  
937 significant difference ( $p < 0.01$ ) relative to day 0. The double asterisks (\*\*) indicate a significant  
938 difference ( $p < 0.0001$ ) relative to day 0. The hash symbol (#) indicates a significant difference ( $p < 0.01$ )  
939 between formulations P-0 and S-50.

940

941

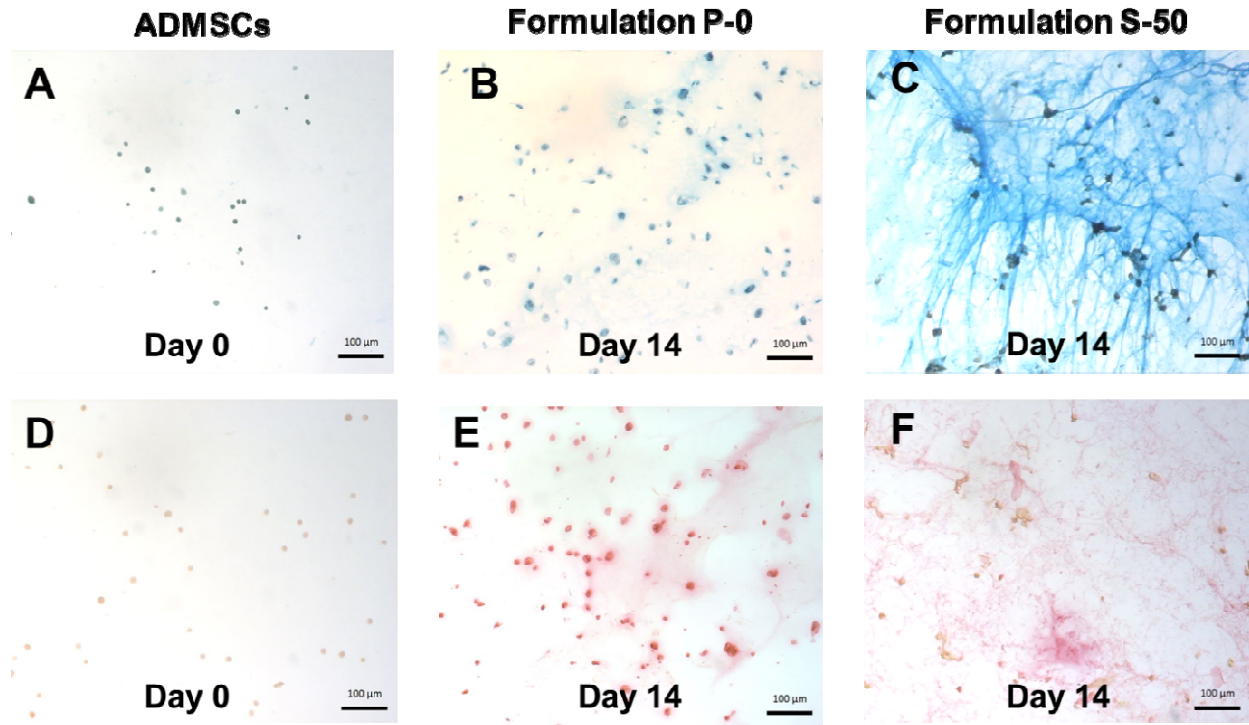

942  
943  
944  
945  
946  
947  
948  
949

**Figure 7.** Representative histological images of ADMSCs cultured within formulation P-0 or S-50 for 0 or 14 days in the presence of soluble GDF-6. GAGs (**A-C**) and collagen (**D-F**) were stained with alcian blue and picrosirius red, respectively. Nuclei were counterstained with Weigert's hematoxylin. Scale bars = 100 µm.

950

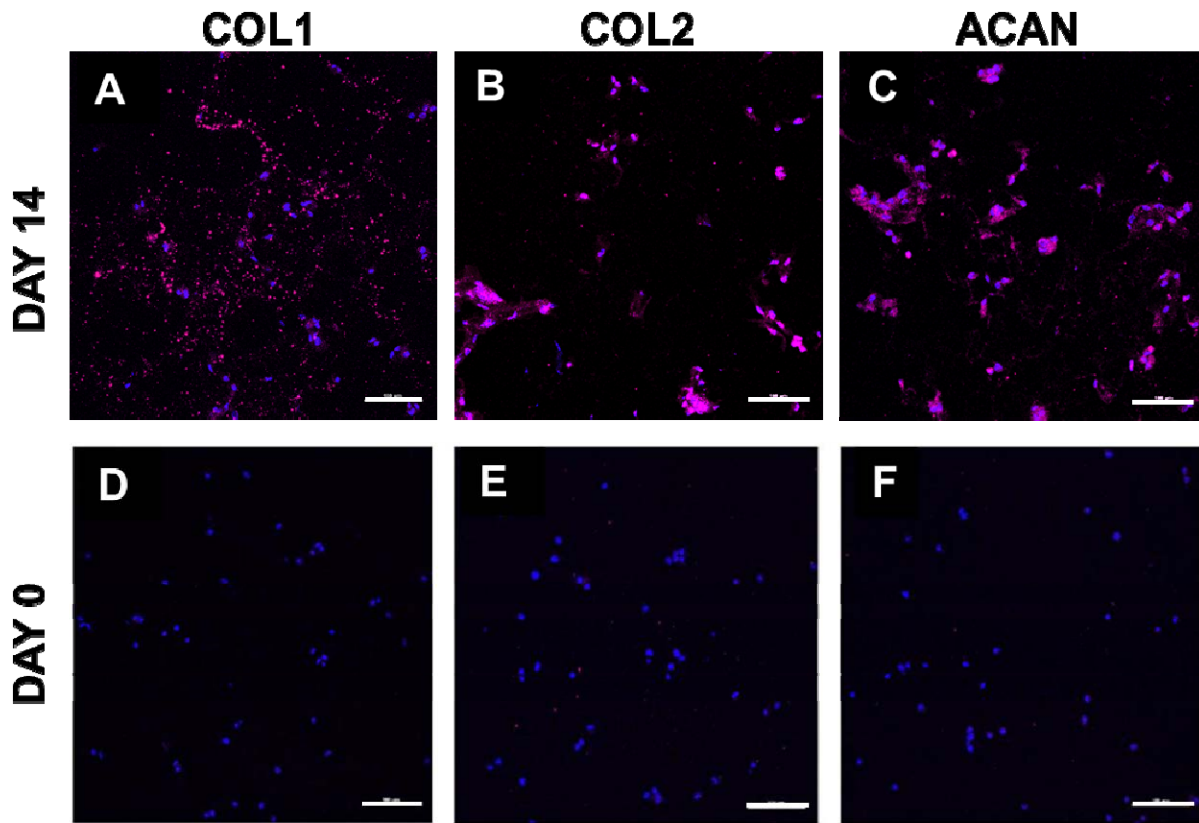

951

952

953

954

955

956

957

958

959

**Figure 8.** Representative immunofluorescent staining (magenta) of (A) COL1, (B) COL2, and (C) ACAN produced by ADMSCs cultured within formulation S-50 for 14 days in the presence of soluble GDF-6. Staining for day 0, immediately after encapsulation, is presented as a comparison in (D-F). Cell nuclei are counterstained with DAPI (blue). Scale bars = 100  $\mu$ m.

960

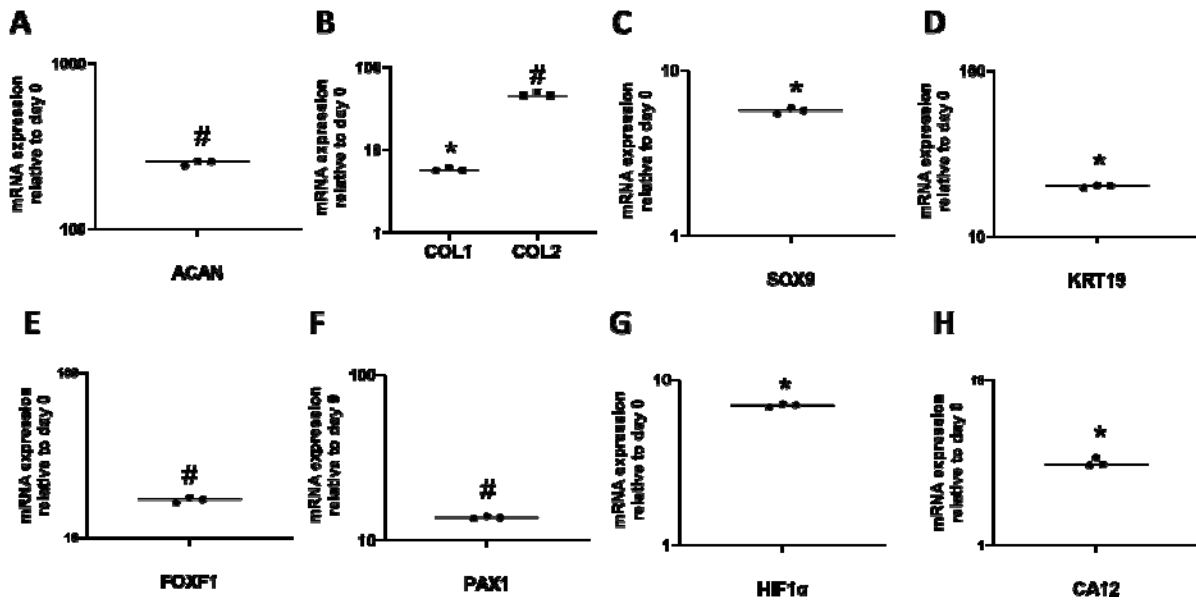

961

962

963

964

965

966

967

968

969

970

**Figure 9.** Relative gene expression profiles of ADMSCs cultured within formulation S-50 for 14 days in the presence of GDF-6. (A) ACAN, (B) COL1 and COL2, (C) SOX9, (D) KRT19, (E) FOXF1, (F) PAX1, (G) HIF1 $\alpha$ , and (H) CA12 were upregulated relative to day 0. Data were normalized to the expression levels of GAPDH. An asterisk (\*) indicates a significant upregulation ( $p < 0.0001$ ) relative to day 0. The hash symbol (#) indicates a significant upregulation ( $p < 0.01$ ) relative to day 0.

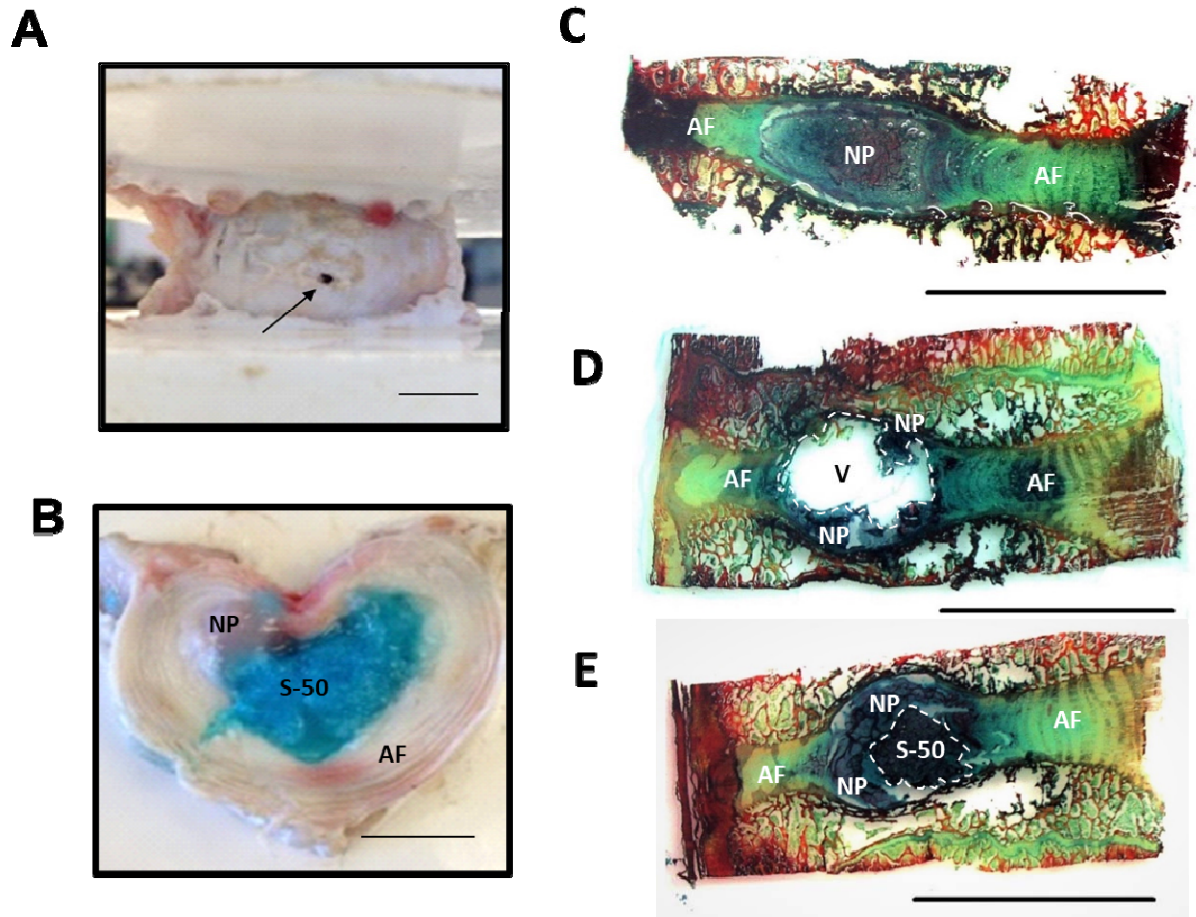

971  
972 **Figure 10.** (A) The porcine IVD after puncture with an 18G needle. (B) Gross visualization of a  
973 transverse cross section of the IVD containing formulation S-50 (dyed blue) within the nuclear cavity. (C)  
974 Sagittal cross section of an intact IVD stained with alcian blue and picrosirius red. (D) A denucleated  
975 IVD. (E) An IVD implanted with S-50. The implant fills void space and closely interfaces with both the  
976 native NP and AF. Scale bars = 1 cm.  
977  
978

979

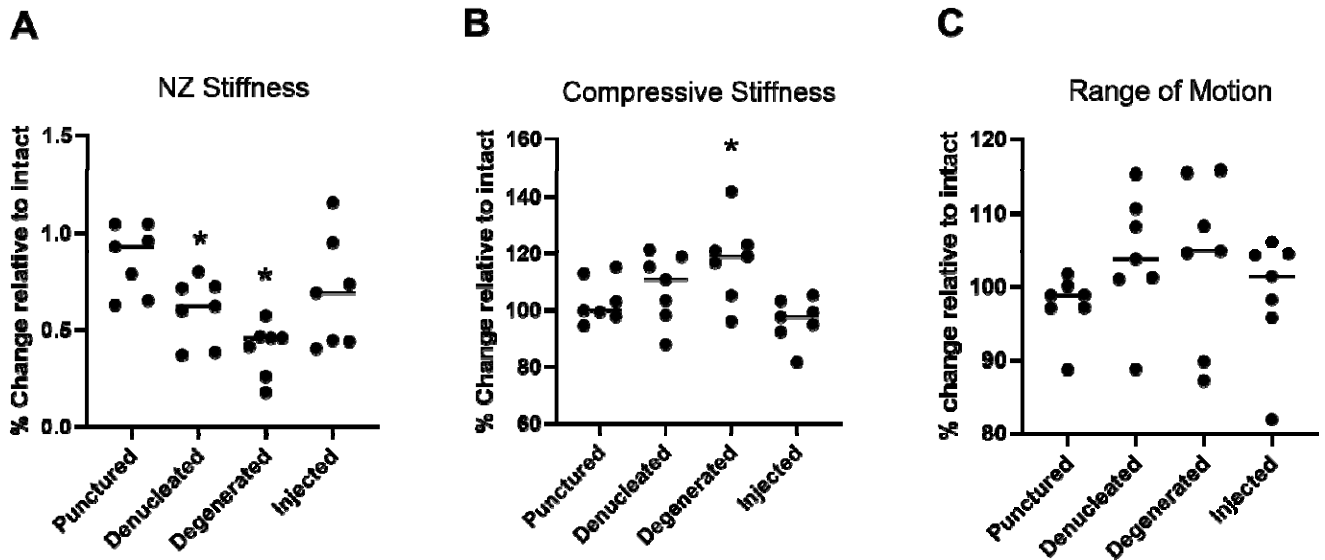

980  
981  
982  
983  
984  
985  
986  
987

**Figure 11.** Axial biomechanical results showing (A) Neutral zone (NZ) stiffness, (B) Compressive stiffness, and (C) Range of motion (ROM) of bovine IVDs relative to the intact state. An asterisk (\*) indicates a statistically significant change relative to intact ( $p < 0.05$ ).



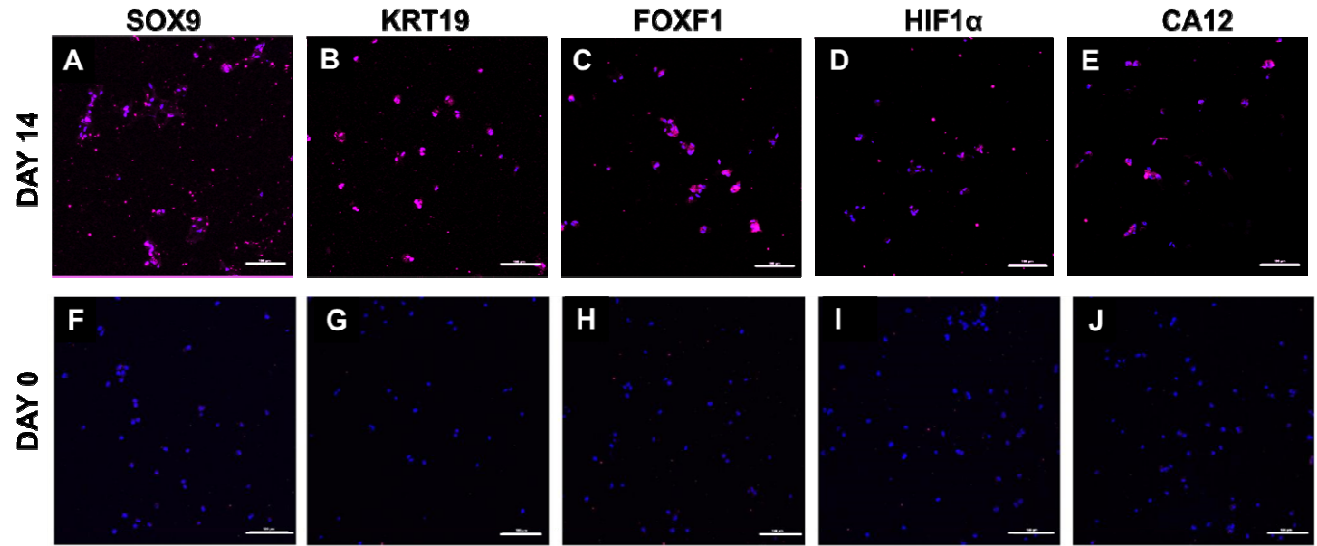

988  
989  
990  
991  
992  
993  
994  
995  
996

**Supplementary Figure 1.** Representative immunofluorescent staining (magenta) of (A) SOX9, (B) KRT19, (C) FOXF1, (D) HIF1 $\alpha$ , and (E) CA12 produced by ADMSCs cultured within S-50 for 14 days in the presence of soluble GDF-6. Staining for day 0, immediately after encapsulation within the bioadhesive, is presented as a comparison in (F-J). Cell nuclei are counterstained with DAPI (blue). Scale bars = 100  $\mu$ m.



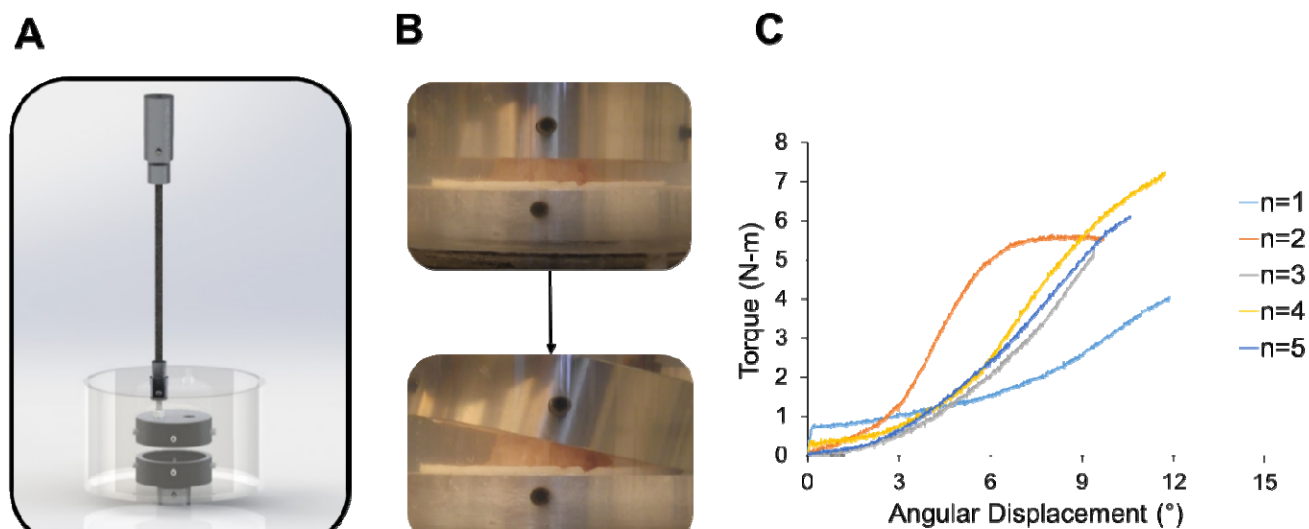

997  
998  
999

1000 **Supplementary Figure 2.** (A) Custom-made mechanical fixtures designed to induce lateral bending of  
1001 the IVD specimen. The vertical rod is offset 25.4 mm from the center of the stainless steel cup and affixed  
1002 to a freely-rotating hinge allowing for rotational movement. (B) High magnitude extrusion test where the  
1003 angle was continuously increased at a rate of 0.1°/sec on the side opposite to the injection site. The test  
1004 was stopped manually when the maximum bending angle was reached due to geometric constraints of the  
1005 tissue. (C) Torque versus angular displacement curves for n=5 repeats of the high magnitude extrusion  
1006 test. The specimens were compressed to average maximum angle of  $11.2 \pm 1.2^\circ$  with no evidence of  
1007 herniation.

1008  
1009

1010  
1011  
1012  
1013

**Table 1.** Formulations of 5 % (w/v) PNIPAAm-g-CS with or without suspended alginate MPs of various concentrations and diameters were evaluated in this study.

| <b>Formulation Designation</b> | <b>MP Diameter (<math>\mu\text{m}</math>)</b> | <b>MP Concentration (mg/mL)</b> |
|--------------------------------|-----------------------------------------------|---------------------------------|
| P-0                            | n/a                                           | 0                               |
| S-25                           | $20.0 \pm 6.0$                                | 25                              |
| S-50                           | $20.0 \pm 6.0$                                | 50                              |
| L-25                           | $120.0 \pm 39$                                | 25                              |
| L-50                           | $120.0 \pm 39$                                | 50                              |

**Table 2.** Complex moduli ( $G^*$ ) and phase angle ( $\delta$ ) for each formulation as a function of frequency ( $\omega$ ). All formulations with MPs (S-25, S-50, L-25 and L-50) exhibited statistically significant increases in  $G^*$  and  $\delta$  compared to P-0 ( $p < 0.05$ ) at both frequency levels, 0.1 and 15 Hz.

| Property              | Formulation | $\omega$ (Hz)  |                |
|-----------------------|-------------|----------------|----------------|
|                       |             | 0.1            | 15             |
| $\delta$ ( $^\circ$ ) | P-0         | $3.7 \pm 0.1$  | $1.7 \pm 0.6$  |
|                       | S-25        | $9.6 \pm 1.3$  | $10.7 \pm 1.5$ |
|                       | S-50        | $20.9 \pm 1.2$ | $21.3 \pm 1.5$ |
|                       | L-25        | $12.6 \pm 1.3$ | $13.6 \pm 1.7$ |
|                       | L-50        | $21.0 \pm 1.4$ | $26.9 \pm 1.8$ |
| $G^*$ (Pa)            | P-0         | $129 \pm 20$   | $194 \pm 33$   |
|                       | S-25        | $268 \pm 61$   | $565 \pm 152$  |
|                       | S-50        | $1454 \pm 263$ | $3637 \pm 806$ |
|                       | L-25        | $183 \pm 39$   | $426 \pm 38$   |
|                       | L-50        | $814 \pm 97$   | $2215 \pm 331$ |

**Supplementary Table 1.** Genes of interest for ADMSCs cultured within formulation S-50 for 14 days in the presence of soluble GDF-6.

| <b>Gene</b>   | <b>Forward Primer (5' – 3')</b> | <b>Reverse Primer (5' – 3')</b> | <b>Product Size (bp)</b> |
|---------------|---------------------------------|---------------------------------|--------------------------|
| COL1          | CCTGCTGGCAAGAGTGGTGAT           | GAAGCCACGGTGACCCTTTATG          | 165                      |
| COL2          | GGCAATAGCAGGTTACGTACA           | CGATAACAGTCTTGCCCCACTT          | 79                       |
| ACAN          | TCGAGGACAGCGAGGCC               | TCGAGGGTGTAGCGTGTAGAGA          | 85                       |
| SOX9          | AGCGAACGCACATCAAGAC             | CTGTAGGCGATCTGTTGGGG            | 85                       |
| KRT19         | GATAGTGAGCGGCAGAATCA            | CCTCCAAAGGACAGCAGAAG            | 178                      |
| CA12          | CGTGCTCCTGCTGGTGATCT            | AGTCCACTTGGAACCGTTCACT          | 70                       |
| HIF1 $\alpha$ | GGGTTGAAACTCAAGCAACTGTC         | GTGCTGAATAATACCACTCACAACG       | 98                       |
| FOXF1         | AAGCCGCCCTATTCCTACATC           | GCGCTTGGTGGGTGAACT              | 63                       |
| PAX1          | TGGCCCTCGGCACACTC               | GCCCCTGTTTGCTCCATAAA            | 65                       |
| GAPDH         | CAGCGACACCCACTCCTC              | TGAGGTCCACCACCCTGT              | 122                      |

**Supplementary Table 2.** Proteins of interest for immunofluorescent labeling of ADMSCs cultured within formulation S-50 for 14 days in the presence of soluble GDF-6.

| <b>Protein</b> | <b>Manufacturer</b> | <b>Antibody Type</b> | <b>Species</b>    | <b>Clonality</b> | <b>Dilution</b> |
|----------------|---------------------|----------------------|-------------------|------------------|-----------------|
| COL1           | ab90395             | Primary              | Mouse anti-human  | Monoclonal       | 1:100           |
| COL2           | ab185430            | Primary              | Mouse anti-human  | Monoclonal       | 1:200           |
| ACAN           | ab3778              | Primary              | Mouse anti-human  | Monoclonal       | 1:50            |
| SOX9           | ab76997             | Primary              | Mouse anti-human  | Monoclonal       | 1:100           |
| KRT19          | ab7754              | Primary              | Mouse anti-human  | Monoclonal       | 1:200           |
| CA12           | ab195233            | Primary              | Rabbit anti-human | Monoclonal       | 1:50            |
| HIF1 $\alpha$  | ab51608             | Primary              | Rabbit anti-human | Monoclonal       | 1:100           |
| FOXF1          | ab168383            | Primary              | Rabbit anti-human | Monoclonal       | 1:100           |
